# Supplementary material for: Carbon-economic biosynthesis of poly-2-hydrobutanedioic acid driven by nonfermentable substrate ethanol
Source: Royal Society of Chemistry journal article supplement (doi:10.1039/d2gc02480b), 2022-01-01

**Carbon-economic biosynthesis of poly-2-hydrobutanedioic acid  
driven by nonfermentable substrate ethanol**

Pan Wang<sup>a#</sup>, Bingqin Li<sup>a#</sup>, Baiyue Li<sup>a</sup>, Jing Yang<sup>a</sup>, Xingran Xu<sup>a</sup>, Shang-tian Yang<sup>b</sup>,  
Xiang Zou<sup>a\*</sup>

*a. College of Pharmaceutical Sciences, Southwest University, Chongqing 400715, P.  
R. China*

*b. William G. Lowrie Department of Chemical and Biomolecular Engineering, The Ohio  
State University, 151 West Woodruff Ave., Columbus, OH 43210, USA*

# Pan Wang and Bingqin Li contributed equally to this work

*\*Author for correspondence*

*Prof. Xiang Zou*

*Address: College of Pharmaceutical Sciences, Southwest University 2 Tian Sheng  
Road, Beibei, Chongqing 400715*

*People's Republic of China*

*Fax: +86-23-68251225*

*E-mail address: [zhx1030@swu.edu.cn](mailto:zhx1030@swu.edu.cn)*

**Fig. S1.** Colony morphology of *A. pullulans* on plate cultures with different concentrations of carbon sources. A–E. 1%–5% (m/v) glucose plate culture colony morphology. F–J. 1%–5% (v/v) ethanol plate culture colony morphology.

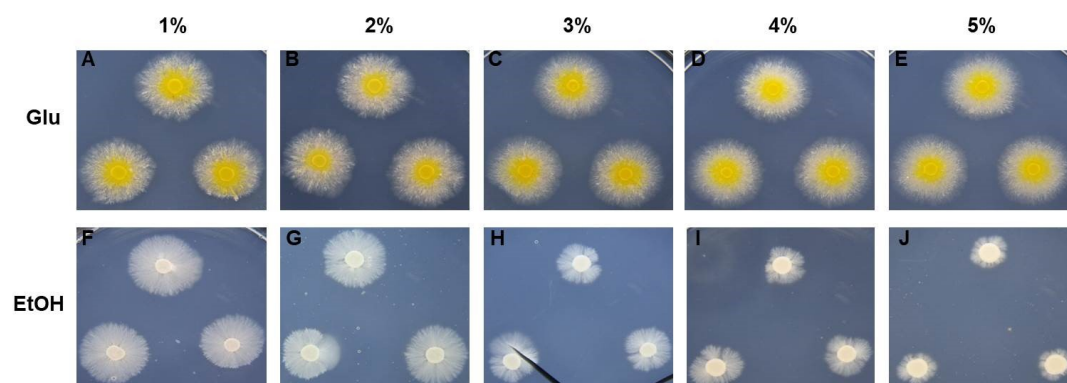

**Fig. S2.** Alignment of Cat8 amino acid sequence of different fungi and *A. pullulans*

CTCC M2012223.

|                                       |  | Conderved sequence |   |   |   |   |   |   |   |   |   |   |     |
|---------------------------------------|--|--------------------|---|---|---|---|---|---|---|---|---|---|-----|
| A.pullulans_CTCC_M2012223_g135.t1     |  | M                  | I | L | P | M | V | I | K | V | G | S | 50  |
| Emmonsia.crescens_PGH35117.1          |  | M                  | I | L | P | M | V | I | K | V | G | S | 50  |
| Blastomyces.parvus_PGH00971.1         |  | M                  | I | L | P | M | V | I | K | V | G | S | 50  |
| Scheffersomyces.stipitidis_CB56054    |  | S                  | V | K | T | N | T | T | I | A | P | G | 49  |
| Saccharomyces.cerevisiae_S288C        |  | K                  | E | M | I | K | T | A | S | P | T | L | 50  |
| Saccharomyces.cerevisiae_P283         |  | K                  | E | M | I | K | T | A | S | P | T | L | 50  |
| Cyberlindnera.jadinii_CEP21463.1      |  | S                  | D | T | V | N | T | T | I | A | P | G | 46  |
| Candida.albicans_AAF35321.1           |  | K                  | H | Q | K | S | K | A | N | T | I | A | 50  |
| Komagataella.phaffii_AOA62582.1       |  | H                  | I | P | S | N | T | G | S | S | T | N | 50  |
| Kluyveromyces.lactis_F2Z5X6           |  | G                  | N | V | S | G | N | T | G | S | R | I | 50  |
| Candida.glabrata_AOA0W0CX50           |  | M                  | I | L | P | M | V | I | K | V | G | S | 50  |
| Aspergillus.ruber_AOA017S650          |  | M                  | I | L | P | M | V | I | K | V | G | S | 50  |
| Aspergillus.ochraceoroseus_AOA0F8U971 |  | M                  | I | L | P | M | V | I | K | V | G | S | 50  |
| Ajellomyces.dermatitidis_F2TCT7       |  | M                  | I | L | P | M | V | I | K | V | G | S | 50  |
| Consensus                             |  |                    | r | a | q | a | c | d | r | c | r | k |     |
|                                       |  |                    |   |   |   |   |   |   |   |   |   |   |     |
| A.pullulans_CTCC_M2012223_g135.t1     |  | C                  | T | S | D | K | L | R | A | F | P | G | 100 |
| Emmonsia.crescens_PGH35117.1          |  | C                  | T | S | D | K | L | R | A | F | P | G | 100 |
| Blastomyces.parvus_PGH00971.1         |  | C                  | T | S | D | K | L | R | A | F | P | G | 100 |
| Scheffersomyces.stipitidis_CB56054    |  | C                  | I | V | S | D | K | L | R | A | F | P | 99  |
| Saccharomyces.cerevisiae_S288C        |  | C                  | I | V | S | D | K | L | R | A | F | P | 100 |
| Saccharomyces.cerevisiae_P283         |  | C                  | I | V | S | D | K | L | R | A | F | P | 100 |
| Cyberlindnera.jadinii_CEP21463.1      |  | C                  | I | V | S | D | K | L | R | A | F | P | 96  |
| Candida.albicans_AAF35321.1           |  | C                  | I | V | S | D | K | L | R | A | F | P | 99  |
| Komagataella.phaffii_AOA62582.1       |  | C                  | I | V | S | D | K | L | R | A | F | P | 100 |
| Kluyveromyces.lactis_F2Z5X6           |  | C                  | I | V | S | D | K | L | R | A | F | P | 100 |
| Candida.glabrata_AOA0W0CX50           |  | C                  | I | V | S | D | K | L | R | A | F | P | 100 |
| Aspergillus.ruber_AOA017S650          |  | C                  | I | V | S | D | K | L | R | A | F | P | 100 |
| Aspergillus.ochraceoroseus_AOA0F8U971 |  | C                  | I | V | S | D | K | L | R | A | F | P | 100 |
| Ajellomyces.dermatitidis_F2TCT7       |  | C                  | I | V | S | D | K | L | R | A | F | P | 100 |
| Consensus                             |  | c                  | s | d | l | r | p | y | t | e | r | r |     |

**Fig. S3.** Schematic showing homologous replacement of *cat8* by homologous donor DNA-mediated HDR via CRISPR-Cas9 system.

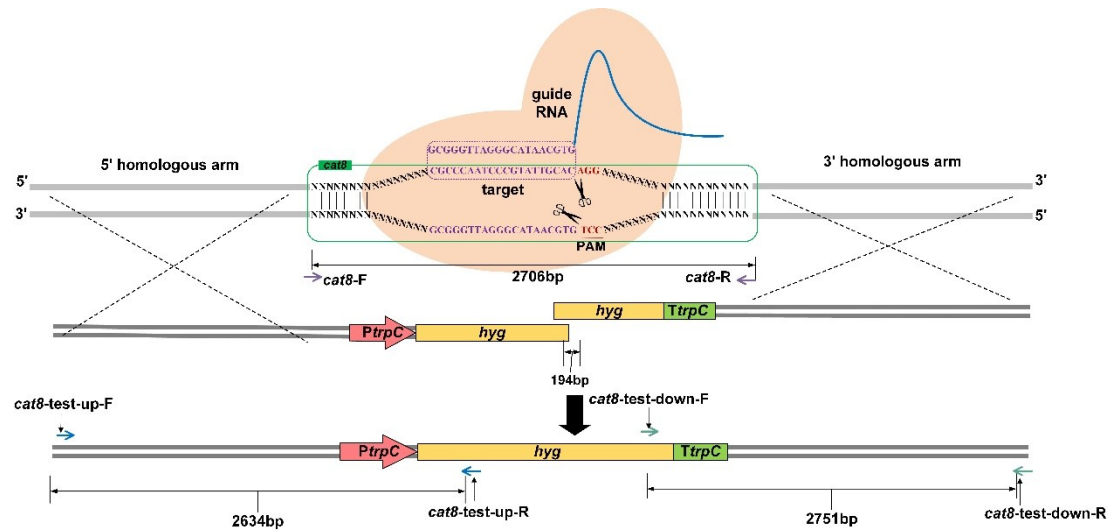

**Fig. S4.** Analysis of the relative mRNA levels of key genes in the glyoxylic acid shunt and the P2HBD synthesis. A. Relative mRNA levels of *icl1* in YJ-ICL1. B. Relative mRNA levels of *icl2* in YJ-ICL2. C. Relative mRNA levels of *mls* in YJ-MLS. D. Fermentation changes of different mutants in shake flask compared with WT. \*:  $0.01 < p < 0.05$ , \*\*:  $0.001 < p < 0.01$ , \*\*\*:  $0.0001 < p < 0.001$ .

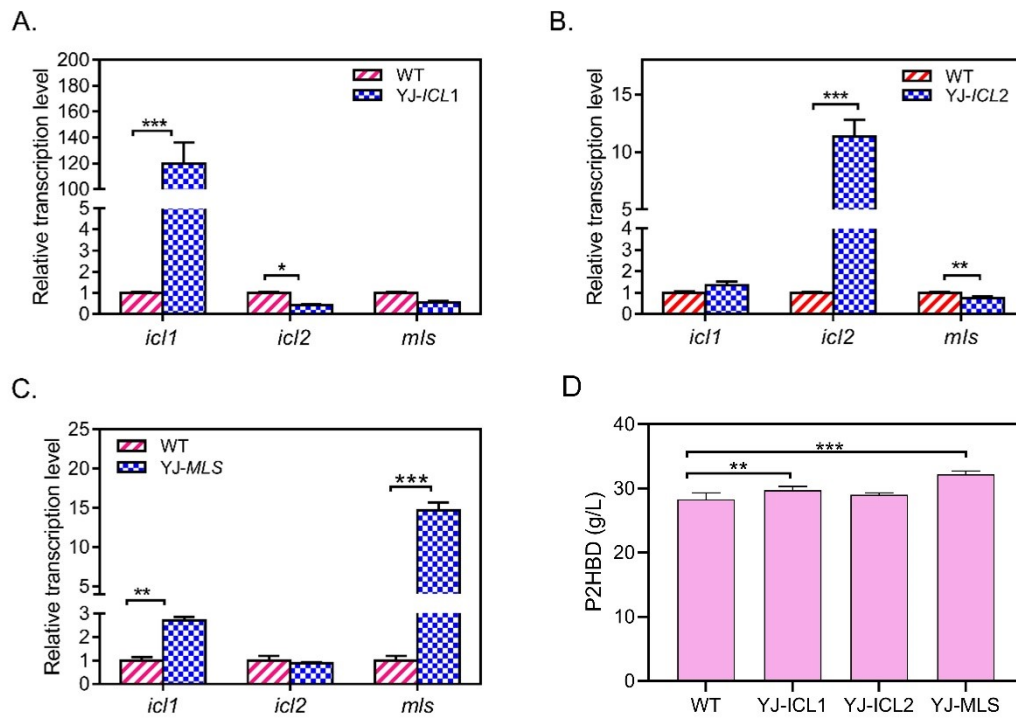

Supplement: d2gc02480b5.pdf [file d2gc02480b5.pdf]
