# Supplementary material for: Carbon-economic biosynthesis of poly-2-hydrobutanedioic acid driven by nonfermentable substrate ethanol
Source: Royal Society of Chemistry journal article supplement (doi:10.1039/d2gc02480b), 2022-01-01
Supplement: d2gc02480b1.pdf [file d2gc02480b1.pdf]

### Supplementary Table S1 All strains used in this study

| Strain ID                   | Relevant genotype                                                                                                                                               | Parental strain | Origin                                                                               |
|-----------------------------|-----------------------------------------------------------------------------------------------------------------------------------------------------------------|-----------------|--------------------------------------------------------------------------------------|
| <b>Modular assembly</b>     |                                                                                                                                                                 |                 |                                                                                      |
| WT                          | <i>A. pullulans</i> CTCC M2012223                                                                                                                               |                 | X. Zou, Y. P. Zhou and S. T. Yang, <i>Biotechnol. Bioeng.</i> , 2013, 110, 2105-2113 |
| EGG 01                      | WT-OE::( <i>gpdAp-adh-trapCt</i> )                                                                                                                              | WT              | This study                                                                           |
| EGG 02                      | WT-OE::( <i>gpdAp-acs-trapCt</i> )                                                                                                                              | WT              | This study                                                                           |
| EGG 03                      | WT-OE::( <i>gpdAp-adh</i> -"gggs"- <i>acs-trapCt</i> )                                                                                                          | WT              | This study                                                                           |
| EGG 04                      | WT-OE::( <i>gpdAp-icl-trapCt</i> )                                                                                                                              | WT              | This study                                                                           |
| EGG 05                      | WT-OE::( <i>gpdAp-mls-trapCt</i> )                                                                                                                              | WT              | This study                                                                           |
| EGG 06                      | WT-OE::( <i>gpdAp-icl</i> -"gggs"- <i>mls-trapCt</i> )                                                                                                          | WT              | This study                                                                           |
| EGG 07                      | WT-OE::( <i>gpdAp-cat8-trapCt</i> )+( <i>gpdAp-icl</i> -"gggs"- <i>mls-trapCt</i> )                                                                             | EGG 06          | This study                                                                           |
| EGG 09                      | WT-OE::( <i>gpdAp-adh</i> -"gggs"- <i>acs-trapCt</i> )+( <i>gpdAp-cat8-trapCt</i> )+( <i>gpdAp-icl</i> -"gggs"- <i>mls-trapCt</i> )                             | EGG 07          | This study                                                                           |
| EGG 10                      | WT-OE::( <i>gpdAp-adh</i> -"gggs"- <i>acs-trapCt</i> )+( <i>gpdAp-cat8-trapCt</i> )+( <i>gpdAp-icl</i> -"gggs"- <i>mls-trapCt</i> )+( <i>gpdAp-pck-trapCt</i> ) | EGG 09          | This study                                                                           |
| EGG 11                      | WT-OE::( <i>Asp. PGKp-cat8-CYC1t</i> )+( <i>gpdAp-icl</i> -"gggs"- <i>mls-trapCt</i> )                                                                          | EGG 07          | This study                                                                           |
| EGG 12                      | WT-OE::( <i>Asp. FBAP-cat8-CYC1t</i> )+( <i>gpdAp-icl</i> -"gggs"- <i>mls-trapCt</i> )                                                                          | EGG 07          | This study                                                                           |
| EGG 13                      | WT-OE::( <i>Asp. PGIp-cat8-CYC1t</i> )+( <i>gpdAp-icl</i> -"gggs"- <i>mls-trapCt</i> )                                                                          | EGG 07          | This study                                                                           |
| EGG 14                      | WT-OE::( <i>Rt. FBAP-cat8-CYC1t</i> )+( <i>gpdAp-icl</i> -"gggs"- <i>mls-trapCt</i> )                                                                           | EGG 07          | This study                                                                           |
| EGG 15                      | WT-OE::( <i>Rt. PGIp-cat8-CYC1t</i> )+( <i>gpdAp-icl</i> -"gggs"- <i>mls-trapCt</i> )                                                                           | EGG 07          | This study                                                                           |
| <b>Promoter engineering</b> |                                                                                                                                                                 |                 |                                                                                      |
| EGG 16                      | WT-OE::( <i>Asp. PGKp-cat8-CYC1t</i> )+( <i>gpdAp-icl</i> -"gggs"- <i>mls-trapCt</i> )+( <i>Asp. FBAP-adh</i> -"gggs"- <i>acs-CYC1t</i> )                       | EGG 11          | This study                                                                           |
| EGG 17                      | WT-OE::( <i>Asp. PGKp-cat8-CYC1t</i> )+( <i>gpdAp-icl</i> -"gggs"- <i>mls-trapCt</i> )+( <i>Rt. FBAP-adh</i> -"gggs"- <i>acs-CYC1t</i> )                        | EGG 11          | This study                                                                           |

|          |                                                                                                                          |        |            |
|----------|--------------------------------------------------------------------------------------------------------------------------|--------|------------|
| EGG 11N1 | WT-OE:: <i>(Asp. PGKp-cat8-CYC1t)+(gpdAp-icl-"gggs"-mls-trapCt)+(Asp. PGKp-adh-"gggs"-acs-CYC1t)</i>                     | EGG 11 | This study |
| EGG 11N3 | WT-OE:: <i>(Asp. PGKp-cat8-CYC1t)+(gpdAp-icl-"gggs"-mls-trapCt)+(Asp. PGIp-adh-"gggs"-acs-CYC1t)</i>                     | EGG 11 | This study |
| EGG 11N5 | WT-OE:: <i>(Asp. PGKp-cat8-CYC1t)+(gpdAp-icl-"gggs"-mls-trapCt)+(Rt. PGIp-adh-"gggs"-acs-CYC1t)</i>                      | EGG 11 | This study |
| EGG 18   | WT-OE:: <i>(Asp. FBAp-cat8-CYC1t)+(gpdAp-icl-"gggs"-mls-trapCt)+(Asp. PGIp-adh-"gggs"-acs-CYC1t)</i>                     | EGG 12 | This study |
| EGG 12N1 | WT-OE:: <i>(Asp. FBAp-cat8-CYC1t)+(gpdAp-icl-"gggs"-mls-trapCt)+(Asp. PGKp-adh-"gggs"-acs-CYC1t)</i>                     | EGG 12 | This study |
| EGG 12N2 | WT-OE:: <i>(Asp. FBAp-cat8-CYC1t)+(gpdAp-icl-"gggs"-mls-trapCt)+(Asp. FBAp-adh-"gggs"-acs-CYC1t)</i>                     | EGG 12 | This study |
| EGG 12N4 | WT-OE:: <i>(Asp. FBAp-cat8-CYC1t)+(gpdAp-icl-"gggs"-mls-trapCt)+(Rt. FBAp-adh-"gggs"-acs-CYC1t)</i>                      | EGG 12 | This study |
| EGG 12N5 | WT-OE:: <i>(Asp. FBAp-cat8-CYC1t)+(gpdAp-icl-"gggs"-mls-trapCt)+(Rt. PGIp-adh-"gggs"-acs-CYC1t)</i>                      | EGG 12 | This study |
| EGG 19   | WT-OE:: <i>(Asp. PGIp-cat8-CYC1t)+(gpdAp-icl-"gggs"-mls-trapCt)+(Asp. PGIp-adh-"gggs"-acs-CYC1t)</i>                     | EGG 13 | This study |
| EGG 13N1 | WT-OE:: <i>(Asp. PGIp-cat8-CYC1t)+(gpdAp-icl-"gggs"-mls-trapCt)+(Asp. PGKp-adh-"gggs"-acs-CYC1t)</i>                     | EGG 13 | This study |
| EGG 13N2 | WT-OE:: <i>(Asp. PGIp-cat8-CYC1t)+(gpdAp-icl-"gggs"-mls-trapCt)+(Asp. FBAp-adh-"gggs"-acs-CYC1t)</i>                     | EGG 13 | This study |
| EGG 13N4 | WT-OE:: <i>(Asp. PGIp-cat8-CYC1t)+(gpdAp-icl-"gggs"-mls-trapCt)+(Rt. FBAp-adh-"gggs"-acs-CYC1t)</i>                      | EGG 13 | This study |
| EGG 13N5 | WT-OE:: <i>(Asp. PGIp-cat8-CYC1t)+(gpdAp-icl-"gggs"-mls-trapCt)+(Rt. PGIp-adh-"gggs"-acs-CYC1t)</i>                      | EGG 13 | This study |
| EGG 20   | WT-OE:: <i>(Rt. FBAp-cat8-CYC1t)+(gpdAp-icl-"gggs"-mls-trapCt)+(Asp. PGIp-adh-"gggs"-acs-CYC1t)</i>                      | EGG 14 | This study |
| EGG 21   | WT-OE:: <i>(Rt. FBAp-cat8-CYC1t)+(gpdAp-icl-"gggs"-mls-trapCt)+(Asp. PGKp-adh-"gggs"-acs-CYC1t)</i>                      | EGG 14 | This study |
| EGG 22   | WT-OE:: <i>(Rt. FBAp-cat8-CYC1t)+(gpdAp-icl-"gggs"-mls-trapCt)+(Asp. PGIp-adh-"gggs"-acs-CYC1t)</i>                      | EGG 14 | This study |
| EGG 23   | WT-OE:: <i>(Rt. FBAp-cat8-CYC1t)+(gpdAp-icl-"gggs"-mls-trapCt)+(Rt. PGIp-adh-"gggs"-acs-CYC1t)</i>                       | EGG 14 | This study |
| EGG 14N2 | WT-OE:: <i>(Rt. FBAp-cat8-CYC1t)+(gpdAp-icl-"gggs"-mls-trapCt)+(Asp. FBAp-adh-"gggs"-acs-CYC1t)</i>                      | EGG 14 | This study |
| EGG 14N4 | WT-OE:: <i>(Rt. FBAp-cat8-CYC1t)+(gpdAp-icl-"gggs"-mls-trapCt)+(Rt. FBAp-adh-"gggs"-acs-CYC1t)</i>                       | EGG 14 | This study |
| EGG 24   | WT-OE:: <i>(Rt. PGIp-cat8-CYC1t)+(gpdAp-icl-"gggs"-mls-trapCt)+(Asp. PGIp-adh-"gggs"-acs-CYC1t)</i>                      | EGG 15 | This study |
| EGG 25   | WT-OE:: <i>(Rt. PGIp-cat8-CYC1t)+(gpdAp-icl-"gggs"-mls-trapCt)+(Rt. PGIp-adh-"gggs"-acs-CYC1t)</i>                       | EGG 15 | This study |
| EGG 15N1 | WT-OE:: <i>(Rt. PGIp-cat8-CYC1t)+(gpdAp-icl-"gggs"-mls-trapCt)+(Asp. PGKp-adh-"gggs"-acs-CYC1t)</i>                      | EGG 15 | This study |
| EGG 15N2 | WT-OE:: <i>(Rt. PGIp-cat8-CYC1t)+(gpdAp-icl-"gggs"-mls-trapCt)+(Asp. FBAp-adh-"gggs"-acs-CYC1t)</i>                      | EGG 15 | This study |
| EGG 15N4 | WT-OE:: <i>(Rt. PGIp-cat8-CYC1t)+(gpdAp-icl-"gggs"-mls-trapCt)+(Rt. FBAp-adh-"gggs"-acs-CYC1t)</i>                       | EGG 15 | This study |
| EGG 26   | WT-OE:: <i>(Rt. FBAp-cat8-CYC1t)+(gpdAp-icl-"gggs"-mls-trapCt)+(Rt. PGIp-adh-"gggs"-acs-CYC1t)+(Asp. PGKp-pck-CYC1t)</i> | EGG 23 | This study |
| EGG 28   | WT-OE:: <i>(Rt. FBAp-cat8-CYC1t)+(gpdAp-icl-"gggs"-mls-trapCt)+(Rt. PGIp-adh-"gggs"-acs-CYC1t)+(Asp. FBAp-pck-CYC1t)</i> | EGG 23 | This study |

|                                                 |                                                                                                                           |        |            |
|-------------------------------------------------|---------------------------------------------------------------------------------------------------------------------------|--------|------------|
| EGG 29                                          | WT-OE::( <i>Rt. FBAP-cat8-CYC1t</i> )+(gpdAp-icl-"gggs"-mls-trapCt)+(Rt. PGIp-adh-"gggs"-acs-CYC1t)+(Asp. PGIp-pck-CYC1t) | EGG 23 | This study |
| EGG 30                                          | WT-OE::( <i>Rt. FBAP-cat8-CYC1t</i> )+(gpdAp-icl-"gggs"-mls-trapCt)+(Rt. PGIp-adh-"gggs"-acs-CYC1t)+(Rt. FBAP-pck-CYC1t)  | EGG 23 | This study |
| EGG 35                                          | WT-OE::( <i>Rt. FBAP-cat8-CYC1t</i> )+(gpdAp-icl-"gggs"-mls-trapCt)+(Rt. PGIp-adh-"gggs"-acs-CYC1t)+(Rt. PGIp-pck-CYC1t)  | EGG 23 | This study |
| <b>Adaptive evolution of 1%~3%(v/v) ethanol</b> |                                                                                                                           |        |            |
| EGG 36                                          | 14 droplet in adaptive evolution                                                                                          | EGG 35 | This study |
| EGG 37                                          | 17 droplet in adaptive evolution                                                                                          | EGG 35 | This study |
| EGG 38                                          | 19 droplet in adaptive evolution                                                                                          | EGG 35 | This study |
| EGG 39                                          | 21 droplet in adaptive evolution                                                                                          | EGG 35 | This study |
| EGG 40                                          | 23 droplet in adaptive evolution                                                                                          | EGG 35 | This study |
| EGG 41                                          | 26 droplet in adaptive evolution                                                                                          | EGG 35 | This study |
| EGG 42                                          | 27 droplet in adaptive evolution                                                                                          | EGG 35 | This study |
| EGG 43                                          | 28 droplet in adaptive evolution                                                                                          | EGG 35 | This study |
| EGG 44                                          | 41 droplet in adaptive evolution                                                                                          | EGG 35 | This study |
| EGG 45                                          | 42 droplet in adaptive evolution                                                                                          | EGG 35 | This study |
| EGG 46                                          | 50 droplet in adaptive evolution                                                                                          | EGG 35 | This study |
| Adaptive evolution of 1%~5%(v/v) ethanol        |                                                                                                                           |        |            |
| EGG 47                                          | 2 droplet in adaptive evolution                                                                                           | EGG 36 | This study |
| EGG 48                                          | 29 droplet in adaptive evolution                                                                                          | EGG 36 | This study |
| EGG 49                                          | 32 droplet in adaptive evolution                                                                                          | EGG 36 | This study |
| EGG 50                                          | 34 droplet in adaptive evolution                                                                                          | EGG 36 | This study |
| EGG 51                                          | 35 droplet in adaptive evolution                                                                                          | EGG 36 | This study |
| EGG 52                                          | 36 droplet in adaptive evolution                                                                                          | EGG 36 | This study |
| EGG 53                                          | 38 droplet in adaptive evolution                                                                                          | EGG 36 | This study |
| EGG 54                                          | 39 droplet in adaptive evolution                                                                                          | EGG 36 | This study |
| EGG 55                                          | 40 droplet in adaptive evolution                                                                                          | EGG 36 | This study |
| EGG 56                                          | 44 droplet in adaptive evolution                                                                                          | EGG 36 | This study |

---
