# Supplementary material for: Carbon-economic biosynthesis of poly-2-hydrobutanedioic acid driven by nonfermentable substrate ethanol
Source: Royal Society of Chemistry journal article supplement (doi:10.1039/d2gc02480b), 2022-01-01
Supplement: d2gc02480b2.pdf [file d2gc02480b2.pdf]

**Supplementary Table S2 Primers used in this study**

| Primer Name                           | Sequence (5' - 3')                              | Description                                                                       |
|---------------------------------------|-------------------------------------------------|-----------------------------------------------------------------------------------|
| <i>cat8</i> -F                        | atgccaggcatcctaccc                              | Amplification of the <i>cat8</i> gene                                             |
| <i>cat8</i> -R                        | tcacgaggcttgaagaacag                            |                                                                                   |
| Cat8- <i>Sma</i> I-F                  | ctcgactctagaggatccccatgccaggcatcctacccatg       | Amplification of the <i>cat8</i> gene                                             |
| Cat8- <i>myc</i> <sup>13</sup> -R     | cctcccatagagccaccgcccaggcttgaagaacagcagtg       |                                                                                   |
| Cat8- <i>myc</i> <sup>13</sup> -F     | attacgaattccccggggatctggtgcactctcagtacaatc      | Amplification of the <i>myc</i> <sup>13</sup> and ADH1 terminator                 |
| <i>myc</i> <sup>13</sup> -R           | cgataagcttgatatcgaattcacagatctatattacctgttatccc |                                                                                   |
| A-A-test-F                            | acgttaagtggatctcggtg                            | Verify that the <i>cat8-myc</i> <sup>13</sup> fragment is successfully recombined |
| A-A-test-R                            | catcttcccatccaagaacc                            |                                                                                   |
| <i>gpdA-cat8-myc</i> <sup>13</sup> -F | gctatgacatgattacgaattcgcagcggagagacggac         | Amplification of the <i>cat8-myc</i> <sup>13</sup> cassette                       |
| <i>gpdA-cat8-myc</i> <sup>13</sup> -R | catcttctgtcgcaggaattcacagatctatattacctgttatccc  |                                                                                   |
| cds-F                                 | gcacgacaggtttcccgact                            | Verify that the <i>cat8-myc</i> <sup>13</sup> cassette is successfully recombined |
| cds-R                                 | ctcaccgcctggacgactaa                            |                                                                                   |
| p426- <i>cat8</i> -F                  | gaaacagctatgacccgagg                            | Amplification of the upstream fragment of <i>cat8</i> sgRNA                       |
| SNpro- <i>cat8</i> -N-R               | gtgcaatacgggattggcgggatcatttatcttctactcggag     |                                                                                   |
| cr- <i>cat8</i> -N-F                  | cgccaatcccgtattgcacgttttagagctagaaatagcaag      | Amplification of the downstream fragment of <i>cat8</i> sgRNA                     |
| p426- <i>cat8</i> -R                  | ttgtaaacgacggccagt                              |                                                                                   |
| p426-sgRNA-test-F                     | cacgacaggtttcccgactg                            | Verify that <i>cat8</i> sgRNA is successfully constructed                         |
| p426-N-test-R                         | gtgcaatacgggattggcg                             |                                                                                   |
| PC- <i>cat8</i> -up-F                 | cacaccgcatatgctggatcccacatgtttgctccacatgc       | Construction of the upstream homology arm of <i>cat8</i> gene knockout            |
| <i>cat8</i> -up- <i>hyg</i> -R        | gataagcggcgttcaagttgg                           |                                                                                   |
| <i>cat8</i> -up- <i>hyg</i> -F        | ccaactgaacgccgttatctcgcagagaagatgacattgaaggagc  | Construction of the downstream homology arm of <i>cat8</i> gene knockout          |
| PC- <i>cat8</i> -up-R                 | aggggttccgcgcaaagcttctcaggacattgttgagcc         |                                                                                   |
| PC- <i>cat8</i> -down-F               | cacaccgcatatgctggatccgtcaatacactacatggcgtg      |                                                                                   |

|                              |                                                   |                                                                                             |
|------------------------------|---------------------------------------------------|---------------------------------------------------------------------------------------------|
| PC-down- <i>hyg</i> -R       | aggggtccgcgcaaagcttaagaaggattaccttaacaagtg        |                                                                                             |
| PC-down- <i>hyg</i> -F       | ctgttttagaggaatccttctgtatagttggcgacccgg           |                                                                                             |
| PC- <i>cat8</i> -down-R      | aggggtccgcgcaaagcttcgagccattctatattcacagcc        |                                                                                             |
| PCB004-F                     | cctttgagtgagctgataccg                             |                                                                                             |
| PCB004-R                     | agggtattgtctcatgagcg                              | Verify that the <i>cat8</i> knockout homology arm is successfully constructed               |
| <i>cat8</i> -test-up-F       | cgactcagattgctcgagagcg                            |                                                                                             |
| <i>cat8</i> -test-up-R       | cgtcaggacattgttgagcc                              | Verify whether the split marker donor is successfully inserted into the knockout gene locus |
| <i>cat8</i> -test-down-F     | gccgataacagcggtcattg                              |                                                                                             |
| <i>cat8</i> -test-down-R     | ctacgaggcagcctttacgtg                             |                                                                                             |
| <i>actin</i> -F              | gaagtgcgatgctgatgacaga                            |                                                                                             |
| <i>actin</i> -R              | ggagcaaggcgggtgatt                                | <i>β-actin</i> relative expression level detection primer                                   |
| qP- <i>cat8</i> -F-1         | ctcgtattcttctcgggtgc                              |                                                                                             |
| qP- <i>cat8</i> -R-1         | cggtgggttgatcattgc                                | <i>cat8</i> relative expression level detection primer                                      |
| <i>icl1</i> -qF              | gttggggagtatgaagatgctg                            |                                                                                             |
| <i>icl1</i> -qR              | gaggaaggtagattgctgc                               | <i>icl1</i> relative expression level detection primer                                      |
| <i>icl2</i> -qF              | gactatgctgctcgtggtatgc                            |                                                                                             |
| <i>icl2</i> -qR              | acacaccaccgaaaccatc                               | <i>icl2</i> relative expression level detection primer                                      |
| <i>mls</i> -qF               | tggctctaccgacagaaagatg                            |                                                                                             |
| <i>mls</i> -qR               | atggcatcgtagaggttgagc                             | <i>mls</i> relative expression level detection primer                                       |
| <i>adh</i> - <i>Sma</i> I-F  | ctcgactctagaggatccccatgctggccactgagactatgaatatg   |                                                                                             |
| <i>adh</i> - <i>EcoR</i> I-R | cgataagcttgatcgaattctcactcctgtttaaagtcgacaacaatcc | Amplification of the <i>adh</i> gene                                                        |
| <i>acs</i> - <i>Sma</i> I-F  | cctcgactctagaggatccccatgctgacggagatgttaaaccgc     |                                                                                             |
| <i>acs</i> - <i>EcoR</i> I-R | cgataagcttgatcgaattctactcttctgctgctgcacaacc       | Amplification of the <i>acs</i> gene                                                        |
| pBAR- <i>pck</i> -F          | ctcgactctagaggatccccatggttccaacagcgtcaacaag       |                                                                                             |
| pBAR- <i>pck</i> -R          | cgataagcttgatcgaattctcaagctgaggaccggcc            | Amplification of the <i>pck</i> gene                                                        |
| <i>adh</i> - <i>acs</i> -F   | ggcgggtgctctatgtctgacggagatgttaaaccg              | Overlapping the <i>adh</i> and <i>acs</i>                                                   |

|                         |                                                  |                                                                |
|-------------------------|--------------------------------------------------|----------------------------------------------------------------|
| <i>adh-acs</i> -R       | gtcagacatagagccaccgccctcctgtftaaagtcgacaacaatccg |                                                                |
| <i>icl1</i> -F          | atgcgtcgagcaaccattcag                            |                                                                |
| <i>icl1</i> -R          | ctagaaactcctcctcgtgttacc                         | Amplification of the <i>icl1</i> gene                          |
| <i>icl2</i> -F          | atgtcttcttctctcgcgacgc                           |                                                                |
| <i>icl2</i> -R          | tcagtggftctcctcagccttg                           | Amplification of the <i>icl2</i> gene                          |
| <i>mls</i> -F           | atggcacaacaagacc                                 |                                                                |
| <i>mls</i> -R           | ctacagcttgaggcaggag                              | Amplification of the <i>mls</i> gene                           |
| <i>eGFP</i> -F          | tcgactctagaggatccccatggtgagcaaggcgag             | Amplification of the <i>eGFP</i>                               |
| <i>icl1-eGFP</i> -R     | tgaatggtgctcgcgcatgactgcagaattcgaagcttgag        | Amplification of the <i>eGFP</i> fused with <i>icl1</i>        |
| <i>icl2-eGFP</i> -R     | tcgagagaagaagacatgactgcagaattcgaagcttgag         | Amplification of the <i>eGFP</i> fused with <i>icl2</i>        |
| <i>mls-eGFP</i> -R      | tggtcttggtttgccatgactgcagaattcgaagcttgag         | Amplification of the <i>eGFP</i> fused with <i>mls</i>         |
| pBAR- <i>icl1</i> -R    | gataagcttgatatcgaattctagaaactcctcgtgttacc        | Amplification of <i>icl1</i> linking to P bargpe1              |
| pBAR- <i>icl2</i> -R    | gataagcttgatatcgaattcagtggtctcctcagccttg         | Amplification of <i>icl2</i> linking to pBARGPE1               |
| pBAR- <i>mls</i> -R     | gataagcttgatatcgaattctacagctggaggcaggag          | Amplification of the <i>mls</i> linking to pBARGPE1            |
| <i>PgpdA</i> -test-F    | cgcatccgcttacagaca                               |                                                                |
| <i>TrpC</i> -test-R     | caggattgctgttatctgatgagt                         | Test the <i>icl/mls</i> cassette                               |
| pK2- <i>hyg-gpdA</i> -F | ctatgacatgattacgaattcggcatccgcttacagaca          |                                                                |
| pK2- <i>hyg-trpC</i> -R | tcattctgtcgcgaattcaggtattgctgttatctgatgagt       | Amplification of the <i>icl/mls</i> cassette                   |
| <i>gpdA-icl1</i> -F     | tcgactctagaggatccccatgcgtcgagcaaccattcag         |                                                                |
| <i>mls-icl1</i> -R      | gagctcgagatctgagtcggagaaactcctcctcgtgttacc       | Amplification of <i>icl1</i> for overlapping                   |
| Linker-F                | tccggactcagatctcgagc                             |                                                                |
| pBAR- <i>mls</i> -R     | cgataagcttgatatcgaattctacagcttgaggcaggag         | Overlapping the <i>icl1</i> and <i>mls</i>                     |
| pK2- <i>hyg-gpdA</i> -F | ctatgacatgattacgaattcggcatccgcttacagaca          |                                                                |
| pK2- <i>hyg-trpC</i> -R | tcattctgtcgcgaattcaggtattgctgttatctgatgagt       | Amplification of the <i>icl-mls</i> cassette                   |
| <i>gpdA</i> -F          | gctatgacatgattacgaattcgcgagagacggac              |                                                                |
| pK2-R                   | catcttctgtcgcgaattcgcattgcagatgagctgtat          | Amplification of the <i>adh /acs/adh-acs/cat8/pck</i> cassette |

|                        |                                               |                                                         |
|------------------------|-----------------------------------------------|---------------------------------------------------------|
| <i>Asp. PGI-F</i>      | gggcagaaaagatagagaaaaggc                      |                                                         |
| <i>hyg-Asp. PGI-R</i>  | gtgagttcaggcttttcatctgatgtttgtggaaaagtgg      | Amplify the <i>Asp. PGI</i> gene                        |
| <i>Asp. FBA-F</i>      | gcactgtcattgcaacctactg                        |                                                         |
| <i>hyg-Asp. FBA-R</i>  | gtgagttcaggcttttcatctgatgtttgtggaaaagtgg      | Amplify the <i>Asp. FBA</i> gene                        |
| <i>Asp. PGK-F</i>      | gtgcgaagtaaaaccaaacagc                        |                                                         |
| <i>hyg-Asp. PGK-R</i>  | gtgagttcaggcttttcatctgatgtttgtggaaaagtgg      | Amplify the <i>Asp. PGK</i> gene                        |
| <i>Rt. PGI-F</i>       | tggccgtctgccatttcacgtcg                       |                                                         |
| <i>hyg-Rt. PGI-R</i>   | gtgagttcaggcttttcatctgatgtttgtggaaaagtgg      | Amplify the <i>Rt. PGI</i> gene                         |
| <i>Rt. FBA-F</i>       | ctctgctctcgcctcgtgtggcttg                     |                                                         |
| <i>hyg-Rt. FBA-R</i>   | gtgagttcaggcttttcatctgatgtttgtggaaaagtgg      | Amplify the <i>Rt. FBA</i> gene                         |
| <i>hyg-F</i>           | atgaaaagcctgaactcaccgc                        |                                                         |
| <i>hyg-R</i>           | ctatttctttgccctcggacg                         | Amplification of <i>hyg</i> for overlapping             |
| <i>TrpC-hyg-R</i>      | gataagcttgatcgaattctatttctttgccctcggacg       | Construction of <i>promoter-hyg</i> expression cassette |
| <i>pBAR-Asp. PGI-F</i> | tcgactctagaggatccccgggcagaaaagatagagaaaaggc   | Construction of <i>Asp. PGI-hyg</i> expression cassette |
| <i>pBAR-Asp. FBA-F</i> | tcgactctagaggatccccgcactgtcattgcaacctactg     | Construction of <i>Asp. FBA-hyg</i> expression cassette |
| <i>pBAR-Asp. PGK-F</i> | tcgactctagaggatccccgtgcgaagtaaaaccaaacagc     | Construction of <i>Asp. PGK-hyg</i> expression cassette |
| <i>pBAR-Rt. PGI-F</i>  | tcgactctagaggatccccctgctcctcgtcctgctgtggcttg  | Construction of <i>Rt. PGI-hyg</i> expression cassette  |
| <i>pBAR-Rt. FBA-F</i>  | tcgactctagaggatccccctgctcctcgtcctgctgtggcttg  | Construction of <i>Rt. FBA-hyg</i> expression cassette  |
| <i>pK2-Asp. PGI-F</i>  | ctatgacatgattacgaattgggcagaaaagatagagaaaaggc  | Construction of <i>pK2-Asp. PGI-hyg</i> plasmid         |
| <i>pK2-Asp. FBA-F</i>  | ctatgacatgattacgaattgcactgtcattgcaacctactg    | Construction of <i>pK2-Asp. FBA-hyg</i> plasmid         |
| <i>pK2-Asp. PGK-F</i>  | ctatgacatgattacgaattgtgcgaagtaaaaccaaacagc    | Construction of <i>pK2-Asp. PGK-hyg</i> plasmid         |
| <i>pK2-Rt. PGI-F</i>   | ctatgacatgattacgaattggccgtctgccatttcacgtc     | Construction of <i>pK2-Rt. PGI-hyg</i> plasmid          |
| <i>pK2-Rt. FBA-F</i>   | ctatgacatgattacgaattctcctcctcgtcctgctgtggcttg | Construction of <i>pK2-Rt. FBA-hyg</i> plasmid          |
| <i>pK2-TrpC-R</i>      | agtggatccccgggaattcaggtattgctgttatctga        | Construction of <i>pK2-promoter-hyg</i> plasmid         |
| <i>qP-hyg-F</i>        | tgtcctgcgggtaaatagc                           |                                                         |
| <i>qP-hyg-R</i>        | tgtgaacggcgggagatg                            | <i>hyg</i> relative expression level detection primer   |

|                                |                                                |                                                                         |
|--------------------------------|------------------------------------------------|-------------------------------------------------------------------------|
| PC-pro-F                       | cggtatttcacaccgcatatggcatccgcttacagacaag       |                                                                         |
| <i>gpdA-CYC1</i> -R            | gcgtgacataactaattacatgactcggtagcggcgaggacc     | Amplify the <i>gpdA</i> promoter                                        |
| Ter-F                          | gtcatgtaaftagttatgtcacgc                       |                                                                         |
| PC- <i>CYC1</i> -R             | aggggttccgcgcaaagcttgaccggccgcaaattaaag        | Amplify the <i>CYC1</i> terminator                                      |
| PC- <i>PGK-Nde I</i> -F        | gcggtatttcacaccgcatatggcggaagtaaaacaaacagc     |                                                                         |
| PC- <i>PGK-Xba I</i> -R        | agcccgggggacacctagatgtgactgaattggatgtgttagac   | Amplify the <i>Asp.PGK</i> promoter                                     |
| PC- <i>FBA-Nde I</i> -F        | gcggtatttcacaccgcatatggcactgtcattgcaacctactg   |                                                                         |
| PC- <i>FBA-Xba I</i> -R        | agcccgggggacacctagagtgtgattgtgtctgtgtgtgctg    | Amplify the <i>Asp.FBA</i> promoter                                     |
| PC- <i>PGI-Nde I</i> -F        | gcggtatttcacaccgcatatggggcagaaaagatagagaaaaggc |                                                                         |
| PC- <i>PGI-Xba I</i> -R        | agcccgggggacacctagactgtatgtttgtgggaaaagtgg     | Amplify the <i>Asp.PGI</i> promoter                                     |
| PC- <i>Rt.FBA</i> -F           | cacaccgcatatgctggatccctctgctctcgctcgctgtg      |                                                                         |
| <i>Rt.FBA</i> -R               | tgtagctagttagttagaagtgaagtgg                   | Amplify the <i>Rt.FBA</i> promoter                                      |
| PC- <i>Rt.PGI-Nde I</i> -F     | gcggtatttcacaccgcatatggccgtctgccatttcacg       |                                                                         |
| PC- <i>Rt.PGI-Xba I</i> -R     | agcccgggggacacctagaggctcgtagcgtggtgagtgaag     | Amplify the <i>Rt.PGI</i> promoter                                      |
| <i>cat8-Sma I</i> -F           | ctcgactctagaggatccccatgccaggcatcctaccatg       |                                                                         |
| <i>cat8-EcoR I</i> -R          | cgataagcttgatacgaattctcacgaggctgaagaacagcag    | Amplification of the <i>cat8</i> gene                                   |
| <i>PGK</i> -test-F             | ctgctgctgtctccacacc                            | Verification of <i>PGK</i> promoter expression cassette                 |
| <i>FBA</i> -test-F             | ctcataccacagcaaccagacaac                       | Verification of <i>FBA</i> promoter expression cassette                 |
| <i>PGI</i> -test-F             | gtacacgcatcaccacccc                            | Verification of <i>PGI</i> promoter expression cassette                 |
| <i>Rt.FBA</i> -test-F          | gctcgctcgtctctcgttg                            | Verification of <i>Rt.FBA</i> promoter expression cassette              |
| <i>Rt.PGI</i> -test-F          | gcttcactcaccagctacg                            | Verification of <i>Rt.PGI</i> promoter expression cassette              |
| <i>CYC1</i> -test-R            | catgcgtacacgcgtctgtac                          | Verification of the promoter library expression cassette reverse primer |
| <i>PGK</i> -pK2- <i>hyg</i> -F | gctatgacatgattacgaattcgtgcgaagtaaaacaaacagc    | Amplified <i>PGK</i> promoter expression cassette                       |
| <i>FBA</i> -pK2- <i>hyg</i> -F | gctatgacatgattacgaattcgcactgtcattgcaacctactg   | Amplified <i>FBA</i> promoter expression cassette                       |
| <i>PGI</i> -pK2- <i>hyg</i> -F | gctatgacatgattacgaattcggcgagaaaagatagagaaaaggc | Amplified <i>PGI</i> promoter expression cassette                       |

|                                   |                                            |                                                               |
|-----------------------------------|--------------------------------------------|---------------------------------------------------------------|
| <i>Rt.FBA</i> -pK2- <i>hyg</i> -F | gctatgacatgattacgaattcctctgctctcgctcgctgtg | Amplified <i>Rt.FBA</i> promoter expression cassette          |
| <i>Rt.PGI</i> -pK2- <i>hyg</i> -F | gctatgacatgattacgaattctggccgtctgccattcatc  | Amplified <i>Rt.PGI</i> promoter expression cassette          |
| <i>CYC1</i> -pK2- <i>hyg</i> -R   | catctctgtcgcgaattcgtaccggccgcaaattaaag     | Amplified promoter library expression cassette reverse primer |

---
