# Supplementary material for: Carbon-economic biosynthesis of poly-2-hydrobutanedioic acid driven by nonfermentable substrate ethanol
Source: Royal Society of Chemistry journal article supplement (doi:10.1039/d2gc02480b), 2022-01-01
Supplement: d2gc02480b3.pdf [file d2gc02480b3.pdf]

### Supplementary Table S3 All plasmids used in this study

| Plasmid                                           | Description                                                                                                                                                                                                                                                                                                                                      | Origin                                                                                                |
|---------------------------------------------------|--------------------------------------------------------------------------------------------------------------------------------------------------------------------------------------------------------------------------------------------------------------------------------------------------------------------------------------------------|-------------------------------------------------------------------------------------------------------|
| <b>pBARGPE1 series of overexpression plasmids</b> |                                                                                                                                                                                                                                                                                                                                                  |                                                                                                       |
| pBARGPE1                                          | pBARGPE1 is a broad host shuttle plasmid and fungal expression plasmid. The strong promoter <i>gpdA</i> from <i>Aspergillus nidulans</i> can be used to initiate the expression of exogenous genes. Bacteria can be screened with <i>AmpR</i> , and glufosinate-ammonium ( <i>Bar</i> ) can be screened when transformed into filamentous fungi. | J. Yang, W. W. Yang, J. Feng, J. Chen, M. Jiang and X. Zou, <i>J. Biotechnol.</i> , 2018, 275, 24-30. |
| pBARGPE1- <i>gpdA-adh-trapC</i>                   | <i>adh</i> overexpression plasmid, used to amplify <i>adh</i> expression cassette                                                                                                                                                                                                                                                                | This study                                                                                            |
| pBARGPE1- <i>gpdA-acs-trapC</i>                   | <i>acs</i> overexpression plasmid, used to amplify <i>acs</i> expression cassette                                                                                                                                                                                                                                                                | This study                                                                                            |
| pBARGPE1- <i>gpdA-adh-acs-trapC</i>               | <i>adh-acs</i> fusion overexpression plasmid, used to amplify <i>adh-acs</i> fusion protein expression cassette                                                                                                                                                                                                                                  | This study                                                                                            |
| pBARGPE1- <i>gpdA-eGFP-icl1-trapC</i>             | <i>eGFP-icl1</i> fusion overexpression plasmid, used to amplify <i>eGFP-icl1</i> fusion protein expression cassette                                                                                                                                                                                                                              | This study                                                                                            |
| pBARGPE1- <i>gpdA-eGFP-icl2-trapC</i>             | <i>eGFP-icl2</i> fusion overexpression plasmid, used to amplify <i>eGFP-icl2</i> fusion protein expression cassette                                                                                                                                                                                                                              | This study                                                                                            |
| pBARGPE1- <i>gpdA-eGFP-mls-trapC</i>              | <i>eGFP-mls</i> fusion overexpression plasmid, used to amplify <i>eGFP-mls</i> fusion protein expression cassette                                                                                                                                                                                                                                | This study                                                                                            |
| pBARGPE1- <i>gpdA-icl1-mls-trapC</i>              | <i>icl1-mls</i> fusion overexpression plasmid, used to amplify <i>icl1-mls</i> fusion protein expression cassette                                                                                                                                                                                                                                | This study                                                                                            |
| pBARGPE1- <i>gpdA-cat8-trapC</i>                  | <i>cat8</i> overexpression plasmid, used to amplify <i>cat8</i> expression cassette                                                                                                                                                                                                                                                              | This study                                                                                            |
| pBARGPE1- <i>gpdA-cat8-myc<sup>13</sup>-trapC</i> | <i>cat8-myc<sup>13</sup></i> fusion overexpression plasmid, used to amplify <i>cat8-myc<sup>13</sup></i> fusion protein expression cassette                                                                                                                                                                                                      | This study                                                                                            |
| pBARGPE1- <i>gpdA-pck-trapC</i>                   | <i>pck</i> overexpression plasmid, used to amplify <i>pck</i> expression cassette                                                                                                                                                                                                                                                                | This study                                                                                            |
| pBARGPE1- <i>gpdA-Asp. PGK-hyg-trapC</i>          | <i>Asp. PGK-hyg</i> fusion overexpression plasmid, used to amplify <i>Asp. PGK-hyg</i> fusion protein expression cassette                                                                                                                                                                                                                        | This study                                                                                            |

|                                                |                                                                                                                                                                                                                                                                                                                                                                                                                                    |                                                                                                       |
|------------------------------------------------|------------------------------------------------------------------------------------------------------------------------------------------------------------------------------------------------------------------------------------------------------------------------------------------------------------------------------------------------------------------------------------------------------------------------------------|-------------------------------------------------------------------------------------------------------|
| pBARGPE1- <i>gpdA-Asp. FBA-hyg-trapC</i>       | <i>Asp. FBA-hyg</i> fusion overexpression plasmid, used to amplify <i>Asp. FBA-hyg</i> fusion protein expression cassette                                                                                                                                                                                                                                                                                                          | This study                                                                                            |
| pBARGPE1- <i>gpdA-Asp. PGI-hyg-trapC</i>       | <i>Asp. PGI-hyg</i> fusion overexpression plasmid, used to amplify <i>Asp. PGI-hyg</i> fusion protein expression cassette                                                                                                                                                                                                                                                                                                          | This study                                                                                            |
| pBARGPE1- <i>gpdA-Rt. FBA-hyg-trapC</i>        | <i>Rt. FBA-hyg</i> fusion overexpression plasmid, used to amplify <i>Rt. FBA-hygA</i> fusion protein expression cassette                                                                                                                                                                                                                                                                                                           | This study                                                                                            |
| pBARGPE1- <i>gpdA-Rt. PGI-hyg-trapC</i>        | <i>Rt. PGI-hyg</i> fusion overexpression plasmid, used to amplify <i>Rt. PGI-hyg</i> fusion protein expression cassette                                                                                                                                                                                                                                                                                                            | This study                                                                                            |
| <b>pK2 series shuttle plasmids</b>             |                                                                                                                                                                                                                                                                                                                                                                                                                                    |                                                                                                       |
| pK2- <i>ptrpc-hyg-trpCt</i>                    | It has the replication function of pK2 plasmid and can replicate in <i>E. coli</i> and <i>Agrobacterium tumefaciens</i> . With Ti plasmid on the left and right sides of the marginal region sequence, so that the DNA can be integrated into the genome of the infected cell. <i>Kan</i> is used as a screening label for bacterial transformants, and <i>hyg</i> is used as a screening label for infecting cell transformants.  | J. Yang, W. W. Yang, J. Feng, J. Chen, M. Jiang and X. Zou, <i>J. Biotechnol.</i> , 2018, 275, 24-30. |
| pK2- <i>ptrpc-neoR-trpCt</i>                   | It has the replication function of pK2 plasmid and can replicate in <i>E. coli</i> and <i>Agrobacterium tumefaciens</i> . With Ti plasmid on the left and right sides of the marginal region sequence, so that the DNA can be integrated into the genome of the infected cell. <i>Kan</i> is used as a screening label for bacterial transformants, and <i>neoR</i> is used as a screening label for infecting cell transformants. | This study                                                                                            |
| pK2- <i>ptrpc-nat-trpCt</i>                    | It has the replication function of pK2 plasmid and can replicate in <i>E. coli</i> and <i>Agrobacterium tumefaciens</i> . With Ti plasmid on the left and right sides of the marginal region sequence, so that the DNA can be integrated into the genome of the infected cell. <i>Kan</i> is used as a screening label for bacterial transformants, and <i>nat</i> is used as a screening label for infecting cell transformants.  | This study                                                                                            |
| pK2- <i>ptrpc-bar-gus-trpCt</i>                | It has the replication function of pK2 plasmid and can replicate in <i>E. coli</i> and <i>Agrobacterium tumefaciens</i> . With Ti plasmid on the left and right sides of the marginal region sequence, so that the DNA can be integrated into the genome of the infected cell. <i>Kan</i> is used as a screening label for bacterial transformants, and <i>bar</i> is used as a screening label for infecting cell transformants.  | This study                                                                                            |
| pK2- <i>gpdA-adh-acs-trapC-ptrpc-hyg-trpCt</i> | The plasmid inserted into the <i>adh-acs</i> fusion expression cassette for <i>Agrobacterium</i> -mediated                                                                                                                                                                                                                                                                                                                         | This study                                                                                            |

|                                                              |                                                                                                                                 |                                                                                      |
|--------------------------------------------------------------|---------------------------------------------------------------------------------------------------------------------------------|--------------------------------------------------------------------------------------|
|                                                              | transformation                                                                                                                  |                                                                                      |
| pK2- <i>gpdA-cat8-trapC-ptRPC-neoR-trpCt</i>                 | The plasmid inserted into the <i>cat8</i> expression cassette for Agrobacterium-mediated transformation                         | This study                                                                           |
| pK2- <i>gpdA-icl1-mls-trapC-ptRPC-bar-gus-trpCt</i>          | The plasmid inserted into the <i>icl1-mls</i> fusion expression cassette for Agrobacterium-mediated transformation              | This study                                                                           |
| pK2- <i>gpdA-pck-trapC-ptRPC-nat-trpCt</i>                   | The plasmid inserted into the <i>pck</i> expression cassette for Agrobacterium-mediated transformation                          | This study                                                                           |
| pK2- <i>gpdA-eGFP-icl1-trapC-ptRPC-hyg-trpCt</i>             | The plasmid inserted into the <i>eGFP-icl1</i> fusion expression cassette for Agrobacterium-mediated transformation             | This study                                                                           |
| pK2- <i>gpdA-eGFP-icl2-trapC-ptRPC-hyg-trpCt</i>             | The plasmid inserted into the <i>eGFP-icl2</i> fusion expression cassette for Agrobacterium-mediated transformation             | This study                                                                           |
| pK2- <i>gpdA-eGFP-mls-trapC-ptRPC-hyg-trpCt</i>              | The plasmid inserted into the <i>eGFP-mls</i> fusion expression cassette for Agrobacterium-mediated transformation              | This study                                                                           |
| pK2- <i>gpdA-cat8-myc<sup>13</sup>-trapC-ptRPC-hyg-trpCt</i> | The plasmid inserted into the <i>cat8-myc<sup>13</sup></i> fusion expression cassette for Agrobacterium-mediated transformation | This study                                                                           |
| pK2- <i>gpdA-Asp. PGK-hyg-trapC-ptRPC-hyg-trpCt</i>          | The plasmid inserted into the <i>Asp. PGK-hyg</i> fusion expression cassette for Agrobacterium-mediated transformation          | This study                                                                           |
| pK2- <i>gpdA-Asp. FBA-hyg-trapC-ptRPC-hyg-trpCt</i>          | The plasmid inserted into the <i>Asp. FBA-hyg</i> fusion expression cassette for Agrobacterium-mediated transformation          | This study                                                                           |
| pK2- <i>gpdA-Asp. PGI-hyg-trapC-ptRPC-hyg-trpCt</i>          | The plasmid inserted into the <i>Asp. PGI-hyg</i> fusion expression cassette for Agrobacterium-mediated transformation          | This study                                                                           |
| pK2- <i>gpdA-Rt. FBA-hyg-trapC-ptRPC-hyg-trpCt</i>           | The plasmid inserted into the <i>Rt. FBA-hyg</i> fusion expression cassette for Agrobacterium-mediated transformation           | This study                                                                           |
| pK2- <i>gpdA-Rt. PGI-hyg-trapC-ptRPC-hyg-trpCt</i>           | The plasmid inserted into the <i>Rt. PGI-hyg</i> fusion expression cassette for Agrobacterium-mediated transformation           | This study                                                                           |
| <b>Knockout plasmids</b>                                     |                                                                                                                                 |                                                                                      |
| p426-loxp- <i>gRNA</i> -Cas9-2Sac II                         | Contains Cas protein and <i>gRNA</i> amplification template. <i>AmpR</i> serves as a screening tag for bacterial transformants. | Y. Zhang, J. Feng, P. Wang, J. Xia, X. R. Li and X. Zou, <i>Gene</i> , 2019, 709, 8- |

|                                                 |                                                                                                                                                     |            |
|-------------------------------------------------|-----------------------------------------------------------------------------------------------------------------------------------------------------|------------|
|                                                 |                                                                                                                                                     | 16.        |
| PCB004                                          | Bacterial expression plasmid, <i>AmpR</i> as a selection label                                                                                      | This study |
| p426-loxp-gRNA( <i>cat8</i> )-Cas9-2Sac II      | <i>cat8</i> knockout plasmid                                                                                                                        | This study |
| PCB004- <i>cat8</i> -up-donor                   | <i>cat8</i> knockout split marker upstream donor amplification template                                                                             | This study |
| PCB004- <i>cat8</i> -down-donor                 | <i>cat8</i> knockout split marker downstream donor amplification template                                                                           | This study |
| <b>Promoter engineering adaptation plasmids</b> |                                                                                                                                                     |            |
| pUC19- <i>Rt. FBA</i>                           | <i>Rhodospiridium toruloides</i> promoter <i>Rt. FBA</i> amplification template                                                                     | This study |
| pUC19- <i>Rt. PGI</i>                           | <i>Rhodospiridium toruloides</i> promoter <i>Rt. PGI</i> amplification template                                                                     | This study |
| PCB004- <i>Asp. PGK-CYC1</i>                    | <i>Asp. PGK</i> -driven template plasmid for the construction of expression cassettes, <i>AmpR</i> as a screening label for bacterial transformants | This study |
| PCB004- <i>Asp. FBA-CYC1</i>                    | <i>Asp. FBA</i> -driven template plasmid for the construction of expression cassettes, <i>AmpR</i> as a screening label for bacterial transformants | This study |
| PCB004- <i>Asp. PGI-CYC1</i>                    | <i>Asp. PGI</i> -driven template plasmid for the construction of expression cassettes, <i>AmpR</i> as a screening label for bacterial transformants | This study |
| PCB004- <i>Rt. FBA-CYC1</i>                     | <i>Rt. FBA</i> -driven template plasmid for the construction of expression cassettes, <i>AmpR</i> as a screening label for bacterial transformants  | This study |
| PCB004- <i>Rt. PGI-CYC1</i>                     | <i>Rt. PGI</i> -driven template plasmid for the construction of expression cassettes, <i>AmpR</i> as a screening label for bacterial transformants  | This study |
| PCB004- <i>Asp. PGK-adh-acs-CYC1</i>            | <i>Asp. PGK</i> -driven <i>adh-acs</i> fusion expression cassette amplification template                                                            | This study |
| PCB004- <i>Asp. FBA-adh-acs-CYC1</i>            | <i>Asp. FBA</i> -driven <i>adh-acs</i> fusion expression cassette amplification template                                                            | This study |
| PCB004- <i>Asp. PGI-adh-acs-CYC1</i>            | <i>Asp. PGI</i> -driven <i>adh-acs</i> fusion expression cassette amplification template                                                            | This study |
| PCB004- <i>Rt. FBA-adh-acs-CYC1</i>             | <i>Rt. FBA</i> -driven <i>adh-acs</i> fusion expression cassette amplification template                                                             | This study |
| PCB004- <i>Rt. PGI-adh-acs-CYC1</i>             | <i>Rt. PGI</i> -driven <i>adh-acs</i> fusion expression cassette amplification template                                                             | This study |
| PCB004- <i>Asp. PGK-cat8-CYC1</i>               | <i>Asp. PGK</i> -driven <i>cat8</i> expression cassette amplification template                                                                      | This study |
| PCB004- <i>Asp. FBA-cat8-CYC1</i>               | <i>Asp. FBA</i> -driven <i>cat8</i> expression cassette amplification template                                                                      | This study |
| PCB004- <i>Asp. PGI-cat8-CYC1</i>               | <i>Asp. PGI</i> -driven <i>cat8</i> expression cassette amplification template                                                                      | This study |

|                                                    |                                                                                                                                           |            |
|----------------------------------------------------|-------------------------------------------------------------------------------------------------------------------------------------------|------------|
| PCB004- <i>Rt. FBA-cat8-CYCI</i>                   | <i>Rt. FBA</i> -driven <i>cat8</i> expression cassette amplification template                                                             | This study |
| PCB004- <i>Rt. PGI-cat8-CYCI</i>                   | <i>Rt. PGI</i> -driven <i>cat8</i> expression cassette amplification template                                                             | This study |
| PCB004- <i>Asp. PGK-pck-CYCI</i>                   | <i>Asp. PGK</i> -driven <i>pck</i> expression cassette amplification template                                                             | This study |
| PCB004- <i>Asp. FBA-pck-CYCI</i>                   | <i>Asp. FBA</i> -driven <i>pck</i> expression cassette amplification template                                                             | This study |
| PCB004- <i>Asp. PGI-pck-CYCI</i>                   | <i>Asp. PGI</i> -driven <i>pck</i> expression cassette amplification template                                                             | This study |
| PCB004- <i>Rt. FBA-pck-CYCI</i>                    | <i>Rt. FBA</i> -driven <i>pck</i> expression cassette amplification template                                                              | This study |
| PCB004- <i>Rt. PGI-pck-CYCI</i>                    | <i>Rt. PGI</i> -driven <i>pck</i> expression cassette amplification template                                                              | This study |
| pK2- <i>Asp. PGK-adh-acs-trapC-ptipc-hyg-trpCt</i> | The plasmid inserted into the <i>Asp. PGK</i> -driven <i>adh-acs</i> fusion expression cassette for Agrobacterium-mediated transformation | This study |
| pK2- <i>Asp. FBA-adh-acs-trapC-ptipc-hyg-trpCt</i> | The plasmid inserted into the <i>Asp. FBA</i> -driven <i>adh-acs</i> fusion expression cassette for Agrobacterium-mediated transformation | This study |
| pK2- <i>Asp. PGI-adh-acs-trapC-ptipc-hyg-trpCt</i> | The plasmid inserted into the <i>Asp. PGI</i> -driven <i>adh-acs</i> fusion expression cassette for Agrobacterium-mediated transformation | This study |
| pK2- <i>Rt. FBA-adh-acs-trapC-ptipc-hyg-trpCt</i>  | The plasmid inserted into the <i>Rt. FBA</i> -driven <i>adh-acs</i> fusion expression cassette for Agrobacterium-mediated transformation  | This study |
| pK2- <i>Rt. PGI-adh-acs-trapC-ptipc-hyg-trpCt</i>  | The plasmid inserted into the <i>Rt. PGI</i> -driven <i>adh-acs</i> fusion expression cassette for Agrobacterium-mediated transformation  | This study |
| pK2- <i>Asp. PGK-cat8-trapC-ptipc-neoR-trpCt</i>   | The plasmid inserted into the <i>Asp. PGK</i> -driven <i>cat8</i> expression cassette for Agrobacterium-mediated transformation           | This study |
| pK2- <i>Asp. FBA-cat8-trapC-ptipc-neoR-trpCt</i>   | The plasmid inserted into the <i>Asp. FBA</i> -driven <i>cat8</i> expression cassette for Agrobacterium-mediated transformation           | This study |
| pK2- <i>Asp. PGI-cat8-trapC-ptipc-neoR-trpCt</i>   | The plasmid inserted into the <i>Asp. PGI</i> -driven <i>cat8</i> expression cassette for Agrobacterium-mediated transformation           | This study |
| pK2- <i>Rt. FBA-cat8-trapC-ptipc-neoR-trpCt</i>    | The plasmid inserted into the <i>Rt. FBA</i> -driven <i>cat8</i> expression cassette for Agrobacterium-mediated transformation            | This study |
| pK2- <i>Rt. PGI-cat8-trapC-ptipc-neoR-trpCt</i>    | The plasmid inserted into the <i>Rt. PGI</i> -driven <i>cat8</i> expression cassette for Agrobacterium-mediated                           | This study |

|                                                |                                                                                                                                |            |
|------------------------------------------------|--------------------------------------------------------------------------------------------------------------------------------|------------|
|                                                | transformation                                                                                                                 |            |
| pK2- <i>Asp. PGK-pck-trapC-ptrpc-nat-trpCt</i> | The plasmid inserted into the <i>Asp. PGK</i> -driven <i>pck</i> expression cassette for Agrobacterium-mediated transformation | This study |
| pK2- <i>Asp. FBA-pck-trapC-ptrpc-nat-trpCt</i> | The plasmid inserted into the <i>Asp. FBA</i> -driven <i>pck</i> expression cassette for Agrobacterium-mediated transformation | This study |
| pK2- <i>Asp. PGI-pck-trapC-ptrpc-nat-trpCt</i> | The plasmid inserted into the <i>Asp. PGI</i> -driven <i>pck</i> expression cassette for Agrobacterium-mediated transformation | This study |
| pK2- <i>Rt. FBA-pck-trapC-ptrpc-nat-trpCt</i>  | The plasmid inserted into the <i>Rt. FBA</i> -driven <i>pck</i> expression cassette for Agrobacterium-mediated transformation  | This study |
| pK2- <i>Rt. PGI-pck-trapC-ptrpc-nat-trpCt</i>  | The plasmid inserted into the <i>Rt. PGI</i> -driven <i>pck</i> expression cassette for Agrobacterium-mediated transformation  | This study |

---
