# Supplementary material for: Carbon-economic biosynthesis of poly-2-hydrobutanedioic acid driven by nonfermentable substrate ethanol
Source: Royal Society of Chemistry journal article supplement (doi:10.1039/d2gc02480b), 2022-01-01
Supplement: d2gc02480b4.pdf [file d2gc02480b4.pdf]

**Supplementary Table S4 Differential gene significance analysis**

| <b>Gene ID</b> | <b>Eth_0h_vs_Eth_2h<br/>significance analysis of<br/>DEGs</b> | <b>Eth_0h_vs_Eth_12h<br/>significance analysis of<br/>DEGs</b> | <b>Eth_2h_vs_Eth_12h<br/>significance analysis of<br/>DEGs</b> | <b>Remarks</b> |
|----------------|---------------------------------------------------------------|----------------------------------------------------------------|----------------------------------------------------------------|----------------|
| <i>g1133</i>   | yes                                                           | yes                                                            | yes                                                            | "yes" means    |
| <i>g3480</i>   | yes                                                           | yes                                                            | yes                                                            | significant    |
| <i>g2415</i>   | yes                                                           | yes                                                            | yes                                                            | difference,    |
| <i>g5942</i>   | yes                                                           | yes                                                            | no                                                             | "no" means     |
| <i>g4680</i>   | yes                                                           | yes                                                            | no                                                             | no             |
| <i>g9296</i>   | yes                                                           | yes                                                            | no                                                             | significant    |
| <i>g3952</i>   | yes                                                           | yes                                                            | no                                                             | difference     |
| <i>g3111</i>   | yes                                                           | yes                                                            | no                                                             |                |
| <i>g5296</i>   | yes                                                           | yes                                                            | no                                                             |                |
| <i>g5828</i>   | yes                                                           | yes                                                            | no                                                             |                |
| <i>g4171</i>   | yes                                                           | yes                                                            | no                                                             |                |
| <i>g4782</i>   | yes                                                           | yes                                                            | no                                                             |                |
| <i>g1730</i>   | yes                                                           | yes                                                            | no                                                             |                |
| <i>g7299</i>   | yes                                                           | yes                                                            | no                                                             |                |
| <i>g1530</i>   | yes                                                           | yes                                                            | no                                                             |                |
| <i>g3101</i>   | yes                                                           | yes                                                            | no                                                             |                |
| <i>g2948</i>   | yes                                                           | yes                                                            | no                                                             |                |
| <i>g3856</i>   | yes                                                           | yes                                                            | no                                                             |                |
| <i>g6539</i>   | yes                                                           | yes                                                            | no                                                             |                |
| <i>g2077</i>   | yes                                                           | yes                                                            | no                                                             |                |
| <i>g8838</i>   | yes                                                           | yes                                                            | no                                                             |                |
| <i>g3899</i>   | yes                                                           | yes                                                            | no                                                             |                |
| <i>g4260</i>   | yes                                                           | yes                                                            | no                                                             |                |
| <i>g1152</i>   | yes                                                           | yes                                                            | no                                                             |                |
| <i>g4165</i>   | yes                                                           | yes                                                            | no                                                             |                |
| <i>g7550</i>   | yes                                                           | yes                                                            | no                                                             |                |
| <i>g2597</i>   | yes                                                           | yes                                                            | no                                                             |                |
| <i>g8811</i>   | yes                                                           | yes                                                            | no                                                             |                |
| <i>g7620</i>   | yes                                                           | yes                                                            | no                                                             |                |
| <i>g4892</i>   | yes                                                           | yes                                                            | no                                                             |                |
| <i>g8650</i>   | yes                                                           | yes                                                            | no                                                             |                |
| <i>g9161</i>   | yes                                                           | yes                                                            | no                                                             |                |
| <i>g112</i>    | yes                                                           | yes                                                            | no                                                             |                |
| <i>g7919</i>   | yes                                                           | yes                                                            | no                                                             |                |
| <i>g4402</i>   | yes                                                           | yes                                                            | no                                                             |                |
| <i>g2182</i>   | yes                                                           | yes                                                            | no                                                             |                |
| <i>g7652</i>   | yes                                                           | yes                                                            | no                                                             |                |
| <i>g6595</i>   | yes                                                           | yes                                                            | no                                                             |                |
| <i>g6246</i>   | yes                                                           | yes                                                            | no                                                             |                |
| <i>g8085</i>   | yes                                                           | yes                                                            | no                                                             |                |

|              |     |     |    |
|--------------|-----|-----|----|
| <i>g2063</i> | yes | yes | no |
| <i>g7912</i> | yes | yes | no |
| <i>g4089</i> | yes | yes | no |
| <i>g7515</i> | yes | yes | no |
| <i>g2580</i> | yes | yes | no |
| <i>g4635</i> | yes | yes | no |
| <i>g3456</i> | yes | yes | no |
| <i>g486</i>  | yes | yes | no |
| <i>g971</i>  | yes | yes | no |
| <i>g7870</i> | yes | yes | no |
| <i>g6889</i> | yes | yes | no |
| <i>g1631</i> | yes | yes | no |
| <i>g9145</i> | yes | yes | no |
| <i>g6935</i> | yes | yes | no |
| <i>g8199</i> | yes | yes | no |
| <i>g3872</i> | yes | yes | no |
| <i>g2856</i> | yes | yes | no |
| <i>g3418</i> | yes | yes | no |
| <i>g6642</i> | yes | yes | no |
| <i>g8770</i> | yes | yes | no |
| <i>g7116</i> | yes | yes | no |
| <i>g5998</i> | yes | yes | no |
| <i>g924</i>  | yes | yes | no |
| <i>g6887</i> | yes | yes | no |
| <i>g964</i>  | yes | yes | no |
| <i>g3348</i> | yes | yes | no |
| <i>g8188</i> | yes | yes | no |
| <i>g4615</i> | yes | yes | no |
| <i>g508</i>  | yes | yes | no |
| <i>g756</i>  | yes | yes | no |
| <i>g6399</i> | yes | yes | no |
| <i>g5461</i> | yes | yes | no |
| <i>g1257</i> | yes | yes | no |
| <i>g4390</i> | yes | yes | no |
| <i>g2788</i> | yes | yes | no |
| <i>g6042</i> | yes | yes | no |
| <i>g3510</i> | yes | yes | no |
| <i>g2942</i> | yes | yes | no |
| <i>g6027</i> | yes | yes | no |
| <i>g5557</i> | yes | yes | no |
| <i>g2452</i> | yes | yes | no |
| <i>g6098</i> | yes | yes | no |
| <i>g4668</i> | yes | yes | no |
| <i>g4902</i> | yes | yes | no |

---

|              |     |     |     |
|--------------|-----|-----|-----|
| <i>g4320</i> | yes | yes | no  |
| <i>g1855</i> | yes | yes | no  |
| <i>g8073</i> | yes | yes | no  |
| <i>g6944</i> | yes | yes | no  |
| <i>g2528</i> | yes | yes | no  |
| <i>g5901</i> | yes | yes | no  |
| <i>g1309</i> | yes | yes | no  |
| <i>g2871</i> | yes | yes | no  |
| <i>g4016</i> | yes | yes | no  |
| <i>g612</i>  | yes | yes | no  |
| <i>g8459</i> | yes | yes | no  |
| <i>g5833</i> | yes | yes | no  |
| <i>g6453</i> | yes | yes | no  |
| <i>g6244</i> | yes | yes | no  |
| <i>g3025</i> | yes | yes | no  |
| <i>g6551</i> | yes | yes | no  |
| <i>g8042</i> | yes | yes | no  |
| <i>g6820</i> | yes | yes | no  |
| <i>g9401</i> | yes | yes | no  |
| <i>g6734</i> | yes | yes | no  |
| <i>g1231</i> | no  | yes | yes |
| <i>g7921</i> | yes | yes | no  |
| <i>g7845</i> | yes | yes | no  |
| <i>g8609</i> | yes | yes | no  |
| <i>g3397</i> | yes | yes | no  |
| <i>g3617</i> | yes | yes | no  |
| <i>g5657</i> | yes | yes | no  |
| <i>g3168</i> | yes | yes | no  |
| <i>g4519</i> | yes | yes | no  |
| <i>g1177</i> | yes | yes | no  |
| <i>g934</i>  | yes | yes | no  |
| <i>g8744</i> | yes | yes | no  |
| <i>g889</i>  | yes | yes | no  |
| <i>g6413</i> | yes | yes | no  |
| <i>g9020</i> | yes | yes | no  |
| <i>g5893</i> | yes | yes | no  |
| <i>g5634</i> | yes | yes | no  |
| <i>g7294</i> | yes | yes | no  |
| <i>g8900</i> | yes | yes | no  |
| <i>g7872</i> | yes | yes | no  |
| <i>g7630</i> | yes | yes | no  |
| <i>g6903</i> | yes | yes | no  |
| <i>g4704</i> | yes | yes | no  |
| <i>g5002</i> | yes | yes | no  |

---

|              |     |     |     |
|--------------|-----|-----|-----|
| <i>g4695</i> | yes | yes | no  |
| <i>g7240</i> | yes | yes | no  |
| <i>g8693</i> | yes | yes | no  |
| <i>g3722</i> | yes | yes | no  |
| <i>g5377</i> | yes | yes | no  |
| <i>g8561</i> | yes | no  | yes |
| <i>g7247</i> | yes | yes | no  |
| <i>g5307</i> | yes | yes | no  |
| <i>g4400</i> | yes | yes | no  |
| <i>g9294</i> | yes | yes | no  |
| <i>g7381</i> | yes | yes | no  |
| <i>g5115</i> | yes | yes | no  |
| <i>g9180</i> | yes | yes | no  |
| <i>g2035</i> | yes | yes | no  |
| <i>g4547</i> | yes | yes | no  |
| <i>g373</i>  | yes | yes | no  |
| <i>g4936</i> | yes | yes | no  |
| <i>g1790</i> | yes | yes | no  |
| <i>g4935</i> | yes | yes | no  |
| <i>g1775</i> | yes | yes | no  |
| <i>g8429</i> | yes | yes | no  |
| <i>g1343</i> | yes | yes | no  |
| <i>g7086</i> | yes | yes | no  |
| <i>g7548</i> | yes | yes | no  |
| <i>g9173</i> | yes | yes | no  |
| <i>g3968</i> | yes | yes | no  |
| <i>g3941</i> | yes | yes | no  |
| <i>g5532</i> | yes | yes | no  |
| <i>g448</i>  | yes | yes | no  |
| <i>g1614</i> | yes | yes | no  |
| <i>g6750</i> | yes | yes | no  |
| <i>g4687</i> | yes | yes | no  |
| <i>g1270</i> | yes | yes | no  |
| <i>g5671</i> | yes | yes | no  |
| <i>g4504</i> | yes | yes | no  |
| <i>g5032</i> | yes | yes | no  |
| <i>g3472</i> | yes | yes | no  |
| <i>g8674</i> | yes | yes | no  |
| <i>g4655</i> | yes | yes | no  |
| <i>g5866</i> | yes | yes | no  |
| <i>g7706</i> | yes | yes | no  |
| <i>g5034</i> | yes | yes | no  |
| <i>g4578</i> | yes | yes | no  |
| <i>g6763</i> | yes | yes | no  |

---

|              |     |     |    |
|--------------|-----|-----|----|
| <i>g8201</i> | yes | yes | no |
| <i>g9349</i> | yes | yes | no |
| <i>g7608</i> | yes | yes | no |
| <i>g201</i>  | yes | yes | no |
| <i>g7977</i> | yes | yes | no |
| <i>g3642</i> | yes | yes | no |
| <i>g7806</i> | yes | yes | no |
| <i>g8378</i> | yes | yes | no |
| <i>g1202</i> | yes | yes | no |
| <i>g2004</i> | yes | yes | no |
| <i>g6794</i> | yes | yes | no |
| <i>g8772</i> | yes | yes | no |
| <i>g6640</i> | yes | yes | no |
| <i>g6636</i> | yes | yes | no |
| <i>g926</i>  | yes | yes | no |
| <i>g1588</i> | yes | yes | no |
| <i>g8713</i> | yes | yes | no |
| <i>g1104</i> | yes | yes | no |
| <i>g6359</i> | yes | yes | no |
| <i>g5654</i> | yes | yes | no |
| <i>g1067</i> | yes | yes | no |
| <i>g663</i>  | yes | yes | no |
| <i>g33</i>   | yes | yes | no |
| <i>g7083</i> | yes | yes | no |
| <i>g6265</i> | yes | yes | no |
| <i>g7210</i> | yes | yes | no |
| <i>g4040</i> | yes | yes | no |
| <i>g6911</i> | yes | yes | no |
| <i>g4039</i> | yes | yes | no |
| <i>g8442</i> | yes | yes | no |
| <i>g2518</i> | yes | yes | no |
| <i>g2499</i> | yes | yes | no |
| <i>g392</i>  | yes | yes | no |
| <i>g2594</i> | yes | yes | no |
| <i>g1180</i> | yes | yes | no |
| <i>g4322</i> | yes | yes | no |
| <i>g4532</i> | yes | yes | no |
| <i>g936</i>  | yes | yes | no |
| <i>g2793</i> | yes | yes | no |
| <i>g4254</i> | yes | yes | no |
| <i>g7270</i> | yes | yes | no |
| <i>g8808</i> | yes | yes | no |
| <i>g8156</i> | yes | yes | no |
| <i>g873</i>  | yes | yes | no |

---

|              |     |     |    |
|--------------|-----|-----|----|
| <i>g5503</i> | yes | yes | no |
| <i>g8344</i> | yes | yes | no |
| <i>g6680</i> | yes | yes | no |
| <i>g5858</i> | yes | yes | no |
| <i>g1850</i> | yes | yes | no |
| <i>g8009</i> | yes | yes | no |
| <i>g4147</i> | yes | yes | no |
| <i>g3123</i> | yes | yes | no |
| <i>g8869</i> | yes | yes | no |
| <i>g146</i>  | yes | yes | no |
| <i>g6305</i> | yes | yes | no |
| <i>g1348</i> | yes | yes | no |
| <i>g8634</i> | yes | yes | no |
| <i>g7887</i> | yes | yes | no |
| <i>g3676</i> | yes | yes | no |
| <i>g9219</i> | yes | yes | no |
| <i>g8223</i> | yes | yes | no |
| <i>g2095</i> | yes | yes | no |
| <i>g7020</i> | yes | yes | no |
| <i>g9343</i> | yes | yes | no |
| <i>g3706</i> | yes | yes | no |
| <i>g8587</i> | yes | yes | no |
| <i>g8232</i> | yes | yes | no |
| <i>g5098</i> | yes | yes | no |
| <i>g548</i>  | yes | yes | no |
| <i>g708</i>  | yes | yes | no |
| <i>g5111</i> | yes | yes | no |
| <i>g2009</i> | yes | yes | no |
| <i>g4510</i> | yes | yes | no |
| <i>g1669</i> | yes | yes | no |
| <i>g2704</i> | yes | yes | no |
| <i>g2044</i> | yes | yes | no |
| <i>g5157</i> | yes | yes | no |
| <i>g9306</i> | yes | yes | no |
| <i>g5431</i> | yes | yes | no |
| <i>g6703</i> | yes | yes | no |
| <i>g2972</i> | yes | yes | no |
| <i>g6898</i> | yes | yes | no |
| <i>g3201</i> | yes | yes | no |
| <i>g5889</i> | yes | yes | no |
| <i>g4679</i> | yes | yes | no |
| <i>g3561</i> | yes | yes | no |
| <i>g886</i>  | yes | yes | no |
| <i>g7963</i> | yes | yes | no |

---

|              |     |     |    |
|--------------|-----|-----|----|
| <i>g6075</i> | yes | yes | no |
| <i>g1480</i> | yes | yes | no |
| <i>g1643</i> | yes | yes | no |
| <i>g6699</i> | yes | yes | no |
| <i>g3162</i> | yes | yes | no |
| <i>g3390</i> | yes | yes | no |
| <i>g6033</i> | yes | yes | no |
| <i>g1718</i> | yes | yes | no |
| <i>g7968</i> | yes | yes | no |
| <i>g5724</i> | yes | yes | no |
| <i>g378</i>  | yes | yes | no |
| <i>g3539</i> | yes | yes | no |
| <i>g2504</i> | yes | yes | no |
| <i>g8000</i> | yes | yes | no |
| <i>g5988</i> | yes | yes | no |
| <i>g3630</i> | yes | yes | no |
| <i>g3356</i> | yes | yes | no |
| <i>g8055</i> | yes | yes | no |
| <i>g7664</i> | yes | yes | no |
| <i>g9273</i> | yes | yes | no |
| <i>g6974</i> | yes | yes | no |
| <i>g2650</i> | yes | yes | no |
| <i>g6107</i> | yes | yes | no |
| <i>g2981</i> | yes | yes | no |
| <i>g4863</i> | yes | yes | no |
| <i>g9290</i> | yes | yes | no |
| <i>g3114</i> | yes | yes | no |
| <i>g5207</i> | yes | yes | no |
| <i>g7534</i> | yes | yes | no |
| <i>g2593</i> | yes | yes | no |
| <i>g6299</i> | yes | yes | no |
| <i>g1095</i> | yes | yes | no |
| <i>g6715</i> | yes | yes | no |
| <i>g4889</i> | yes | yes | no |
| <i>g1014</i> | yes | yes | no |
| <i>g4575</i> | yes | yes | no |
| <i>g810</i>  | yes | yes | no |
| <i>g1973</i> | yes | yes | no |
| <i>g5193</i> | yes | yes | no |
| <i>g8342</i> | yes | yes | no |
| <i>g6168</i> | yes | yes | no |
| <i>g7071</i> | yes | yes | no |
| <i>g1733</i> | yes | yes | no |
| <i>g3502</i> | yes | yes | no |

---

|              |     |     |    |
|--------------|-----|-----|----|
| <i>g6361</i> | yes | yes | no |
| <i>g1375</i> | yes | yes | no |
| <i>g3116</i> | yes | yes | no |
| <i>g5077</i> | yes | yes | no |
| <i>g4500</i> | yes | yes | no |
| <i>g5836</i> | yes | yes | no |
| <i>g8639</i> | yes | yes | no |
| <i>g3710</i> | yes | yes | no |
| <i>g1935</i> | yes | yes | no |
| <i>g6729</i> | yes | yes | no |
| <i>g131</i>  | yes | yes | no |
| <i>g2318</i> | yes | yes | no |
| <i>g1967</i> | yes | yes | no |
| <i>g5128</i> | yes | yes | no |
| <i>g4227</i> | yes | yes | no |
| <i>g7164</i> | yes | yes | no |
| <i>g7808</i> | yes | yes | no |
| <i>g938</i>  | yes | yes | no |
| <i>g608</i>  | yes | yes | no |
| <i>g6830</i> | yes | yes | no |
| <i>g6815</i> | yes | yes | no |
| <i>g9400</i> | yes | yes | no |
| <i>g1706</i> | yes | yes | no |
| <i>g665</i>  | yes | yes | no |
| <i>g5327</i> | yes | yes | no |
| <i>g4329</i> | yes | yes | no |
| <i>g5750</i> | yes | yes | no |
| <i>g2228</i> | yes | yes | no |
| <i>g1520</i> | yes | yes | no |
| <i>g7138</i> | yes | yes | no |
| <i>g4340</i> | yes | yes | no |
| <i>g5733</i> | yes | yes | no |
| <i>g5513</i> | yes | yes | no |
| <i>g3268</i> | yes | yes | no |
| <i>g2865</i> | yes | yes | no |
| <i>g6684</i> | yes | yes | no |
| <i>g5681</i> | yes | yes | no |
| <i>g1207</i> | yes | yes | no |
| <i>g4796</i> | yes | yes | no |
| <i>g3019</i> | yes | yes | no |
| <i>g3541</i> | yes | yes | no |
| <i>g5823</i> | yes | yes | no |
| <i>g3075</i> | yes | yes | no |
| <i>g5376</i> | yes | yes | no |

---



|              |     |     |     |
|--------------|-----|-----|-----|
| <i>g141</i>  | yes | yes | no  |
| <i>g206</i>  | yes | yes | no  |
| <i>g6300</i> | yes | yes | no  |
| <i>g6431</i> | yes | yes | no  |
| <i>g5068</i> | yes | yes | no  |
| <i>g8850</i> | yes | yes | no  |
| <i>g7975</i> | yes | yes | no  |
| <i>g9147</i> | yes | yes | no  |
| <i>g200</i>  | yes | yes | no  |
| <i>g5583</i> | yes | yes | no  |
| <i>g3854</i> | yes | yes | no  |
| <i>g3514</i> | yes | yes | no  |
| <i>g3720</i> | yes | yes | no  |
| <i>g1573</i> | yes | yes | no  |
| <i>g6622</i> | yes | yes | no  |
| <i>g164</i>  | yes | yes | no  |
| <i>g1546</i> | yes | yes | no  |
| <i>g4403</i> | yes | yes | no  |
| <i>g3729</i> | yes | yes | no  |
| <i>g7342</i> | yes | yes | no  |
| <i>g7111</i> | yes | yes | no  |
| <i>g3161</i> | yes | yes | no  |
| <i>g3946</i> | yes | yes | no  |
| <i>g6450</i> | yes | yes | no  |
| <i>g9382</i> | yes | yes | no  |
| <i>g7385</i> | yes | yes | no  |
| <i>g7842</i> | yes | yes | no  |
| <i>g899</i>  | yes | yes | no  |
| <i>g271</i>  | yes | yes | no  |
| <i>g5166</i> | yes | yes | no  |
| <i>g5531</i> | yes | yes | no  |
| <i>g7913</i> | yes | yes | no  |
| <i>g3326</i> | yes | yes | no  |
| <i>g7971</i> | yes | yes | no  |
| <i>g6678</i> | yes | yes | no  |
| <i>g1274</i> | yes | yes | no  |
| <i>g8663</i> | yes | yes | no  |
| <i>g1642</i> | yes | yes | no  |
| <i>g340</i>  | yes | yes | no  |
| <i>g7230</i> | yes | yes | no  |
| <i>g299</i>  | yes | yes | no  |
| <i>g6310</i> | yes | yes | no  |
| <i>g8534</i> | yes | yes | no  |
| <i>g5943</i> | no  | yes | yes |

---

|              |     |     |    |
|--------------|-----|-----|----|
| <i>g4966</i> | yes | yes | no |
| <i>g8679</i> | yes | yes | no |
| <i>g8105</i> | yes | yes | no |
| <i>g9275</i> | yes | yes | no |
| <i>g2585</i> | yes | yes | no |
| <i>g6334</i> | yes | yes | no |
| <i>g4675</i> | yes | yes | no |
| <i>g3035</i> | yes | yes | no |
| <i>g8555</i> | yes | yes | no |
| <i>g4218</i> | yes | yes | no |
| <i>g9432</i> | yes | yes | no |
| <i>g8164</i> | yes | yes | no |
| <i>g401</i>  | yes | yes | no |
| <i>g760</i>  | yes | yes | no |
| <i>g423</i>  | yes | yes | no |
| <i>g8642</i> | yes | yes | no |
| <i>g8261</i> | yes | yes | no |
| <i>g6500</i> | yes | yes | no |
| <i>g7243</i> | yes | yes | no |
| <i>g3490</i> | yes | yes | no |
| <i>g3743</i> | yes | yes | no |
| <i>g5979</i> | yes | yes | no |
| <i>g7859</i> | yes | yes | no |
| <i>g2179</i> | yes | yes | no |
| <i>g5310</i> | yes | yes | no |
| <i>g5937</i> | yes | yes | no |
| <i>g2613</i> | yes | yes | no |
| <i>g3782</i> | yes | yes | no |
| <i>g2754</i> | yes | yes | no |
| <i>g6668</i> | yes | yes | no |
| <i>g9424</i> | yes | yes | no |
| <i>g1083</i> | yes | yes | no |
| <i>g6429</i> | yes | yes | no |
| <i>g2126</i> | yes | yes | no |
| <i>g5687</i> | yes | yes | no |
| <i>g2588</i> | yes | yes | no |
| <i>g2606</i> | yes | yes | no |
| <i>g1327</i> | yes | yes | no |
| <i>g251</i>  | yes | yes | no |
| <i>g2719</i> | yes | yes | no |
| <i>g450</i>  | yes | yes | no |
| <i>g1703</i> | yes | yes | no |
| <i>g182</i>  | yes | yes | no |
| <i>g3651</i> | yes | yes | no |

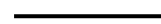

|              |     |     |    |
|--------------|-----|-----|----|
| <i>g4294</i> | yes | yes | no |
| <i>g1024</i> | yes | yes | no |
| <i>g56</i>   | yes | yes | no |
| <i>g8558</i> | yes | yes | no |
| <i>g9317</i> | yes | yes | no |
| <i>g3958</i> | yes | yes | no |
| <i>g9384</i> | yes | yes | no |
| <i>g6989</i> | yes | yes | no |
| <i>g5141</i> | yes | yes | no |
| <i>g6396</i> | yes | yes | no |
| <i>g7936</i> | yes | yes | no |
| <i>g6951</i> | yes | yes | no |
| <i>g3438</i> | yes | yes | no |
| <i>g564</i>  | yes | yes | no |
| <i>g4419</i> | yes | yes | no |
| <i>g8385</i> | yes | yes | no |
| <i>g7450</i> | yes | yes | no |
| <i>g6942</i> | yes | yes | no |
| <i>g6923</i> | yes | yes | no |
| <i>g4212</i> | yes | yes | no |
| <i>g1828</i> | yes | yes | no |
| <i>g1063</i> | yes | yes | no |
| <i>g618</i>  | yes | yes | no |
| <i>g3534</i> | yes | yes | no |
| <i>g4236</i> | yes | yes | no |
| <i>g7019</i> | yes | yes | no |
| <i>g7696</i> | yes | yes | no |
| <i>g1628</i> | yes | yes | no |
| <i>g258</i>  | yes | yes | no |
| <i>g13</i>   | yes | yes | no |
| <i>g4311</i> | yes | yes | no |
| <i>g60</i>   | yes | yes | no |
| <i>g8191</i> | yes | yes | no |
| <i>g8968</i> | yes | yes | no |
| <i>g7498</i> | yes | yes | no |
| <i>g2074</i> | yes | yes | no |
| <i>g7491</i> | yes | yes | no |
| <i>g7196</i> | yes | yes | no |
| <i>g9221</i> | yes | yes | no |
| <i>g4833</i> | yes | yes | no |
| <i>g245</i>  | yes | yes | no |
| <i>g6922</i> | yes | yes | no |
| <i>g419</i>  | yes | yes | no |
| <i>g6220</i> | yes | yes | no |



|              |     |     |    |
|--------------|-----|-----|----|
| <i>g202</i>  | yes | yes | no |
| <i>g449</i>  | yes | yes | no |
| <i>g7978</i> | yes | yes | no |
| <i>g8886</i> | yes | yes | no |
| <i>g6372</i> | yes | yes | no |
| <i>g3536</i> | yes | yes | no |
| <i>g917</i>  | yes | yes | no |
| <i>g9256</i> | yes | yes | no |
| <i>g1256</i> | yes | yes | no |
| <i>g8733</i> | yes | yes | no |
| <i>g4969</i> | yes | yes | no |
| <i>g8961</i> | yes | yes | no |
| <i>g4121</i> | yes | yes | no |
| <i>g7463</i> | yes | yes | no |
| <i>g7946</i> | yes | yes | no |
| <i>g4642</i> | yes | yes | no |
| <i>g6026</i> | yes | yes | no |
| <i>g2837</i> | yes | yes | no |
| <i>g7040</i> | yes | yes | no |
| <i>g5371</i> | yes | yes | no |
| <i>g1371</i> | yes | yes | no |
| <i>g5658</i> | yes | yes | no |
| <i>g7152</i> | yes | yes | no |
| <i>g864</i>  | yes | yes | no |
| <i>g7564</i> | yes | yes | no |
| <i>g4484</i> | yes | yes | no |
| <i>g7059</i> | yes | yes | no |
| <i>g5679</i> | yes | yes | no |
| <i>g5153</i> | yes | yes | no |
| <i>g5126</i> | yes | yes | no |
| <i>g195</i>  | yes | yes | no |
| <i>g1640</i> | yes | yes | no |
| <i>g8893</i> | yes | yes | no |
| <i>g1471</i> | yes | yes | no |
| <i>g4201</i> | yes | yes | no |
| <i>g1409</i> | yes | yes | no |
| <i>g2299</i> | yes | yes | no |
| <i>g6934</i> | yes | yes | no |
| <i>g8320</i> | yes | yes | no |
| <i>g9380</i> | yes | yes | no |
| <i>g4767</i> | yes | yes | no |
| <i>g543</i>  | yes | yes | no |
| <i>g863</i>  | yes | yes | no |
| <i>g1727</i> | yes | yes | no |



|              |     |     |    |
|--------------|-----|-----|----|
| <i>g7325</i> | yes | yes | no |
| <i>g7165</i> | yes | yes | no |
| <i>g5425</i> | yes | yes | no |
| <i>g3039</i> | yes | yes | no |
| <i>g8104</i> | yes | yes | no |
| <i>g6726</i> | yes | yes | no |
| <i>g8145</i> | yes | yes | no |
| <i>g1445</i> | yes | yes | no |
| <i>g2963</i> | yes | yes | no |
| <i>g5666</i> | yes | yes | no |
| <i>g5941</i> | yes | yes | no |
| <i>g176</i>  | yes | yes | no |
| <i>g3746</i> | yes | yes | no |
| <i>g5739</i> | yes | yes | no |
| <i>g6814</i> | yes | yes | no |
| <i>g1646</i> | yes | yes | no |
| <i>g5635</i> | yes | yes | no |
| <i>g3169</i> | yes | yes | no |
| <i>g3741</i> | yes | yes | no |
| <i>g9019</i> | yes | yes | no |
| <i>g424</i>  | yes | yes | no |
| <i>g4963</i> | yes | yes | no |
| <i>g4313</i> | yes | yes | no |
| <i>g2201</i> | yes | yes | no |
| <i>g5862</i> | yes | yes | no |
| <i>g7504</i> | yes | yes | no |
| <i>g6353</i> | yes | yes | no |
| <i>g2217</i> | yes | yes | no |
| <i>g1415</i> | yes | yes | no |
| <i>g4885</i> | yes | yes | no |
| <i>g8706</i> | yes | yes | no |
| <i>g9178</i> | yes | yes | no |
| <i>g6452</i> | yes | yes | no |
| <i>g2251</i> | yes | yes | no |
| <i>g5056</i> | yes | yes | no |
| <i>g8178</i> | yes | yes | no |
| <i>g4439</i> | yes | yes | no |
| <i>g6010</i> | yes | yes | no |
| <i>g7770</i> | yes | yes | no |
| <i>g7594</i> | yes | yes | no |
| <i>g2258</i> | yes | yes | no |
| <i>g815</i>  | yes | yes | no |
| <i>g895</i>  | yes | yes | no |
| <i>g8971</i> | yes | yes | no |

---

|              |     |     |     |
|--------------|-----|-----|-----|
| <i>g3909</i> | yes | yes | no  |
| <i>g3947</i> | yes | yes | no  |
| <i>g1127</i> | no  | yes | yes |
| <i>g6603</i> | yes | yes | no  |
| <i>g5480</i> | yes | yes | no  |
| <i>g2591</i> | yes | yes | no  |
| <i>g4345</i> | yes | yes | no  |
| <i>g5137</i> | yes | yes | no  |
| <i>g6700</i> | yes | yes | no  |
| <i>g3627</i> | yes | yes | no  |
| <i>g2130</i> | yes | yes | no  |
| <i>g8048</i> | yes | yes | no  |
| <i>g7976</i> | yes | yes | no  |
| <i>g8160</i> | yes | yes | no  |
| <i>g426</i>  | yes | yes | no  |
| <i>g4455</i> | yes | yes | no  |
| <i>g3323</i> | yes | yes | no  |
| <i>g3632</i> | yes | yes | no  |
| <i>g8974</i> | yes | yes | no  |
| <i>g3073</i> | yes | yes | no  |
| <i>g2564</i> | yes | yes | no  |
| <i>g6062</i> | yes | yes | no  |
| <i>g5473</i> | yes | yes | no  |
| <i>g5383</i> | yes | yes | no  |
| <i>g4138</i> | yes | yes | no  |
| <i>g5999</i> | yes | yes | no  |
| <i>g4614</i> | yes | yes | no  |
| <i>g7776</i> | yes | yes | no  |
| <i>g4718</i> | yes | yes | no  |
| <i>g5325</i> | yes | yes | no  |
| <i>g8958</i> | yes | yes | no  |
| <i>g6641</i> | yes | yes | no  |
| <i>g8740</i> | yes | yes | no  |
| <i>g925</i>  | yes | yes | no  |
| <i>g1689</i> | yes | yes | no  |
| <i>g9390</i> | yes | yes | no  |
| <i>g8345</i> | yes | yes | no  |
| <i>g2896</i> | yes | yes | no  |
| <i>g1308</i> | yes | yes | no  |
| <i>g1707</i> | yes | yes | no  |
| <i>g1680</i> | yes | yes | no  |
| <i>g521</i>  | yes | yes | no  |
| <i>g3511</i> | yes | yes | no  |
| <i>g7353</i> | yes | yes | no  |



|              |     |     |    |
|--------------|-----|-----|----|
| <i>g4858</i> | yes | yes | no |
| <i>g6665</i> | yes | yes | no |
| <i>g2510</i> | yes | yes | no |
| <i>g9153</i> | yes | yes | no |
| <i>g7150</i> | yes | yes | no |
| <i>g7368</i> | yes | yes | no |
| <i>g706</i>  | yes | yes | no |
| <i>g4632</i> | yes | yes | no |
| <i>g3442</i> | yes | yes | no |
| <i>g4785</i> | yes | yes | no |
| <i>g3988</i> | yes | yes | no |
| <i>g8272</i> | yes | yes | no |
| <i>g8694</i> | yes | yes | no |
| <i>g574</i>  | yes | yes | no |
| <i>g4003</i> | yes | yes | no |
| <i>g1636</i> | yes | yes | no |
| <i>g6515</i> | yes | yes | no |
| <i>g4148</i> | yes | yes | no |
| <i>g6318</i> | yes | yes | no |
| <i>g6370</i> | yes | yes | no |
| <i>g2506</i> | yes | yes | no |
| <i>g8839</i> | yes | yes | no |
| <i>g6546</i> | yes | yes | no |
| <i>g6122</i> | yes | yes | no |
| <i>g7584</i> | yes | yes | no |
| <i>g189</i>  | yes | yes | no |
| <i>g6385</i> | yes | yes | no |
| <i>g8708</i> | yes | yes | no |
| <i>g9244</i> | yes | yes | no |
| <i>g1494</i> | yes | yes | no |
| <i>g5841</i> | yes | yes | no |
| <i>g8127</i> | yes | yes | no |
| <i>g6816</i> | yes | yes | no |
| <i>g6728</i> | yes | yes | no |
| <i>g3483</i> | yes | yes | no |
| <i>g102</i>  | yes | yes | no |
| <i>g7239</i> | yes | yes | no |
| <i>g1670</i> | yes | yes | no |
| <i>g888</i>  | yes | yes | no |
| <i>g5917</i> | yes | yes | no |
| <i>g4133</i> | yes | yes | no |
| <i>g6432</i> | yes | yes | no |
| <i>g4038</i> | yes | yes | no |
| <i>g3967</i> | yes | yes | no |

---

|              |     |     |    |
|--------------|-----|-----|----|
| <i>g554</i>  | yes | yes | no |
| <i>g4217</i> | yes | yes | no |
| <i>g655</i>  | yes | yes | no |
| <i>g4592</i> | yes | yes | no |
| <i>g487</i>  | yes | yes | no |
| <i>g3625</i> | yes | yes | no |
| <i>g4426</i> | yes | yes | no |
| <i>g4263</i> | yes | yes | no |
| <i>g8214</i> | yes | yes | no |
| <i>g670</i>  | yes | yes | no |
| <i>g5500</i> | yes | yes | no |
| <i>g584</i>  | yes | yes | no |
| <i>g3115</i> | yes | yes | no |
| <i>g2029</i> | yes | yes | no |
| <i>g1883</i> | yes | yes | no |
| <i>g5672</i> | yes | yes | no |
| <i>g3260</i> | yes | yes | no |
| <i>g7785</i> | yes | yes | no |
| <i>g4295</i> | yes | yes | no |
| <i>g5078</i> | yes | yes | no |
| <i>g5837</i> | yes | yes | no |
| <i>g6766</i> | yes | yes | no |
| <i>g6490</i> | yes | yes | no |
| <i>g867</i>  | yes | yes | no |
| <i>g1980</i> | yes | yes | no |
| <i>g6789</i> | yes | yes | no |
| <i>g5192</i> | yes | yes | no |
| <i>g7904</i> | yes | yes | no |
| <i>g8165</i> | yes | yes | no |
| <i>g8343</i> | yes | yes | no |
| <i>g6513</i> | yes | yes | no |
| <i>g7507</i> | yes | yes | no |
| <i>g2619</i> | yes | yes | no |
| <i>g9288</i> | yes | yes | no |
| <i>g7826</i> | yes | yes | no |
| <i>g8712</i> | yes | yes | no |
| <i>g5287</i> | yes | yes | no |
| <i>g8529</i> | yes | yes | no |
| <i>g8820</i> | yes | yes | no |
| <i>g2420</i> | yes | yes | no |
| <i>g3391</i> | yes | yes | no |
| <i>g4058</i> | yes | yes | no |
| <i>g1273</i> | yes | yes | no |
| <i>g3970</i> | yes | yes | no |

---



|              |     |     |     |
|--------------|-----|-----|-----|
| <i>g1782</i> | yes | yes | no  |
| <i>g7119</i> | yes | yes | no  |
| <i>g3523</i> | yes | yes | no  |
| <i>g1934</i> | yes | yes | no  |
| <i>g9107</i> | no  | yes | yes |
| <i>g3682</i> | no  | yes | yes |
| <i>g2901</i> | yes | yes | no  |
| <i>g8158</i> | yes | yes | no  |
| <i>g8549</i> | yes | yes | no  |
| <i>g5417</i> | yes | yes | no  |
| <i>g7983</i> | yes | yes | no  |
| <i>g9318</i> | yes | yes | no  |
| <i>g1205</i> | yes | yes | no  |
| <i>g4543</i> | yes | yes | no  |
| <i>g34</i>   | yes | yes | no  |
| <i>g3533</i> | yes | yes | no  |
| <i>g5698</i> | yes | yes | no  |
| <i>g7949</i> | yes | yes | no  |
| <i>g4146</i> | yes | yes | no  |
| <i>g4984</i> | yes | yes | no  |
| <i>g6957</i> | yes | yes | no  |
| <i>g6316</i> | yes | yes | no  |
| <i>g5339</i> | yes | yes | no  |
| <i>g7430</i> | yes | yes | no  |
| <i>g8364</i> | yes | yes | no  |
| <i>g2408</i> | yes | yes | no  |
| <i>g6984</i> | yes | yes | no  |
| <i>g9148</i> | yes | yes | no  |
| <i>g9325</i> | yes | yes | no  |
| <i>g8313</i> | yes | yes | no  |
| <i>g4724</i> | yes | yes | no  |
| <i>g4123</i> | yes | yes | no  |
| <i>g6533</i> | yes | yes | no  |
| <i>g4617</i> | yes | yes | no  |
| <i>g9069</i> | no  | yes | yes |
| <i>g3622</i> | yes | yes | no  |
| <i>g7038</i> | yes | yes | no  |
| <i>g5521</i> | yes | yes | no  |
| <i>g8111</i> | yes | yes | no  |
| <i>g4354</i> | yes | yes | no  |
| <i>g2900</i> | yes | yes | no  |
| <i>g4491</i> | yes | yes | no  |
| <i>g6623</i> | yes | yes | no  |
| <i>g3769</i> | yes | yes | no  |

---

|              |     |     |     |
|--------------|-----|-----|-----|
| <i>g3618</i> | yes | yes | no  |
| <i>g7861</i> | yes | yes | no  |
| <i>g7940</i> | yes | yes | no  |
| <i>g5628</i> | yes | yes | no  |
| <i>g3355</i> | yes | yes | no  |
| <i>g9194</i> | yes | yes | no  |
| <i>g6968</i> | yes | yes | no  |
| <i>g2012</i> | yes | yes | no  |
| <i>g2067</i> | yes | yes | no  |
| <i>g7141</i> | yes | yes | no  |
| <i>g1659</i> | yes | yes | no  |
| <i>g2681</i> | yes | yes | no  |
| <i>g4920</i> | yes | yes | no  |
| <i>g7315</i> | yes | yes | no  |
| <i>g2293</i> | yes | yes | no  |
| <i>g1569</i> | yes | yes | no  |
| <i>g7453</i> | no  | yes | yes |
| <i>g3149</i> | yes | yes | no  |
| <i>g5365</i> | yes | yes | no  |
| <i>g2208</i> | yes | yes | no  |
| <i>g2939</i> | yes | yes | no  |
| <i>g224</i>  | yes | yes | no  |
| <i>g6844</i> | no  | yes | yes |
| <i>g3488</i> | yes | yes | no  |
| <i>g9393</i> | yes | yes | no  |
| <i>g1004</i> | yes | yes | no  |
| <i>g8563</i> | yes | yes | no  |
| <i>g1931</i> | yes | yes | no  |
| <i>g9223</i> | yes | yes | no  |
| <i>g707</i>  | yes | yes | no  |
| <i>g2956</i> | yes | yes | no  |
| <i>g8496</i> | yes | yes | no  |
| <i>g1560</i> | yes | yes | no  |
| <i>g5655</i> | yes | yes | no  |
| <i>g5609</i> | yes | yes | no  |
| <i>g2602</i> | yes | yes | no  |
| <i>g4493</i> | yes | yes | no  |
| <i>g8936</i> | yes | yes | no  |
| <i>g3862</i> | yes | yes | no  |
| <i>g9054</i> | yes | yes | no  |
| <i>g1359</i> | yes | yes | no  |
| <i>g7442</i> | yes | yes | no  |
| <i>g268</i>  | yes | yes | no  |
| <i>g2632</i> | yes | yes | no  |



|              |     |     |    |
|--------------|-----|-----|----|
| <i>g7878</i> | yes | yes | no |
| <i>g8647</i> | yes | yes | no |
| <i>g2300</i> | yes | yes | no |
| <i>g1522</i> | yes | yes | no |
| <i>g2692</i> | yes | yes | no |
| <i>g1721</i> | yes | yes | no |
| <i>g4967</i> | yes | yes | no |
| <i>g2744</i> | yes | yes | no |
| <i>g903</i>  | yes | yes | no |
| <i>g7021</i> | yes | yes | no |
| <i>g2943</i> | yes | yes | no |
| <i>g3757</i> | yes | yes | no |
| <i>g7500</i> | yes | yes | no |
| <i>g6112</i> | yes | yes | no |
| <i>g9228</i> | yes | yes | no |
| <i>g417</i>  | yes | yes | no |
| <i>g7174</i> | yes | yes | no |
| <i>g5424</i> | yes | yes | no |
| <i>g6628</i> | yes | yes | no |
| <i>g6780</i> | yes | yes | no |
| <i>g288</i>  | yes | yes | no |
| <i>g8375</i> | yes | yes | no |
| <i>g8638</i> | yes | yes | no |
| <i>g2875</i> | yes | yes | no |
| <i>g6736</i> | yes | yes | no |
| <i>g3616</i> | yes | yes | no |
| <i>g1702</i> | yes | yes | no |
| <i>g7836</i> | yes | yes | no |
| <i>g674</i>  | yes | yes | no |
| <i>g4901</i> | yes | yes | no |
| <i>g1769</i> | yes | yes | no |
| <i>g3570</i> | yes | yes | no |
| <i>g3044</i> | yes | yes | no |
| <i>g5537</i> | yes | yes | no |
| <i>g6747</i> | yes | yes | no |
| <i>g6472</i> | yes | yes | no |
| <i>g5228</i> | yes | yes | no |
| <i>g7320</i> | yes | yes | no |
| <i>g1492</i> | yes | yes | no |
| <i>g3376</i> | yes | yes | no |
| <i>g6698</i> | yes | yes | no |
| <i>g3592</i> | yes | yes | no |
| <i>g8953</i> | yes | yes | no |
| <i>g9257</i> | yes | yes | no |

---

|              |     |     |     |
|--------------|-----|-----|-----|
| <i>g8550</i> | yes | yes | no  |
| <i>g1854</i> | yes | yes | no  |
| <i>g7157</i> | yes | yes | no  |
| <i>g9052</i> | yes | yes | no  |
| <i>g9385</i> | yes | yes | no  |
| <i>g7678</i> | yes | yes | no  |
| <i>g4601</i> | yes | yes | no  |
| <i>g8557</i> | yes | yes | no  |
| <i>g4321</i> | yes | yes | no  |
| <i>g801</i>  | yes | yes | no  |
| <i>g7538</i> | yes | yes | no  |
| <i>g3437</i> | yes | yes | no  |
| <i>g5062</i> | yes | yes | no  |
| <i>g4115</i> | yes | yes | no  |
| <i>g6395</i> | yes | yes | no  |
| <i>g6309</i> | yes | yes | no  |
| <i>g6356</i> | yes | yes | no  |
| <i>g5682</i> | yes | yes | no  |
| <i>g2548</i> | yes | yes | no  |
| <i>g9040</i> | yes | yes | no  |
| <i>g6541</i> | yes | yes | no  |
| <i>g1924</i> | yes | yes | no  |
| <i>g3269</i> | yes | yes | no  |
| <i>g7193</i> | yes | yes | no  |
| <i>g2964</i> | yes | yes | no  |
| <i>g6402</i> | yes | yes | no  |
| <i>g2387</i> | yes | yes | no  |
| <i>g7191</i> | yes | yes | no  |
| <i>g9366</i> | yes | yes | no  |
| <i>g8501</i> | yes | yes | no  |
| <i>g3721</i> | yes | yes | no  |
| <i>g2406</i> | yes | yes | no  |
| <i>g118</i>  | yes | yes | no  |
| <i>g420</i>  | yes | yes | no  |
| <i>g9426</i> | yes | yes | no  |
| <i>g4596</i> | yes | yes | no  |
| <i>g3945</i> | yes | yes | no  |
| <i>g9060</i> | yes | yes | no  |
| <i>g6679</i> | yes | yes | no  |
| <i>g5630</i> | no  | yes | yes |
| <i>g6899</i> | yes | yes | no  |
| <i>g3517</i> | yes | yes | no  |
| <i>g7390</i> | yes | yes | no  |
| <i>g7137</i> | yes | yes | no  |



|              |     |     |    |
|--------------|-----|-----|----|
| <i>g2771</i> | yes | yes | no |
| <i>g7049</i> | yes | yes | no |
| <i>g4824</i> | yes | yes | no |
| <i>g4435</i> | yes | yes | no |
| <i>g396</i>  | yes | yes | no |
| <i>g8915</i> | yes | yes | no |
| <i>g4508</i> | yes | yes | no |
| <i>g8159</i> | yes | yes | no |
| <i>g1637</i> | yes | yes | no |
| <i>g4468</i> | yes | yes | no |
| <i>g9207</i> | yes | yes | no |
| <i>g1728</i> | yes | yes | no |
| <i>g3807</i> | yes | yes | no |
| <i>g2984</i> | yes | yes | no |
| <i>g3990</i> | yes | yes | no |
| <i>g2780</i> | yes | yes | no |
| <i>g6364</i> | yes | yes | no |
| <i>g5989</i> | yes | yes | no |
| <i>g6108</i> | yes | yes | no |
| <i>g8817</i> | yes | yes | no |
| <i>g6279</i> | yes | yes | no |
| <i>g6101</i> | yes | yes | no |
| <i>g622</i>  | yes | yes | no |
| <i>g2403</i> | yes | yes | no |
| <i>g7521</i> | yes | yes | no |
| <i>g4157</i> | yes | yes | no |
| <i>g8641</i> | yes | yes | no |
| <i>g2321</i> | yes | yes | no |
| <i>g2039</i> | yes | yes | no |
| <i>g7246</i> | yes | yes | no |
| <i>g7506</i> | yes | yes | no |
| <i>g2779</i> | yes | no  | no |
| <i>g4381</i> | no  | yes | no |
| <i>g7874</i> | yes | no  | no |
| <i>g7122</i> | yes | no  | no |
| <i>g4485</i> | yes | no  | no |
| <i>g5938</i> | yes | no  | no |
| <i>g7597</i> | yes | no  | no |
| <i>g1553</i> | no  | yes | no |
| <i>g6072</i> | no  | yes | no |
| <i>g2361</i> | no  | yes | no |
| <i>g8672</i> | yes | no  | no |
| <i>g4612</i> | yes | no  | no |
| <i>g5154</i> | yes | no  | no |

---

|              |     |     |     |
|--------------|-----|-----|-----|
| <i>g4143</i> | no  | yes | no  |
| <i>g7572</i> | no  | yes | no  |
| <i>g8933</i> | yes | no  | no  |
| <i>g8268</i> | no  | no  | yes |
| <i>g425</i>  | yes | no  | no  |
| <i>g5588</i> | yes | no  | no  |
| <i>g5891</i> | yes | no  | no  |
| <i>g4288</i> | no  | yes | no  |
| <i>g8192</i> | no  | yes | no  |
| <i>g1604</i> | yes | no  | no  |
| <i>g1612</i> | yes | no  | no  |
| <i>g7952</i> | no  | yes | no  |
| <i>g3566</i> | yes | no  | no  |
| <i>g2218</i> | yes | no  | no  |
| <i>g729</i>  | yes | no  | no  |
| <i>g5404</i> | no  | yes | no  |
| <i>g4473</i> | no  | yes | no  |
| <i>g9024</i> | yes | no  | no  |
| <i>g3749</i> | yes | no  | no  |
| <i>g8153</i> | no  | yes | no  |
| <i>g6852</i> | no  | yes | no  |
| <i>g2592</i> | yes | no  | no  |
| <i>g7333</i> | yes | no  | no  |
| <i>g8270</i> | no  | yes | no  |
| <i>g4037</i> | yes | no  | no  |
| <i>g418</i>  | yes | no  | no  |
| <i>g8686</i> | yes | no  | no  |
| <i>g6002</i> | yes | no  | no  |
| <i>g5229</i> | yes | no  | no  |
| <i>g6916</i> | yes | no  | no  |
| <i>g2831</i> | yes | no  | no  |
| <i>g3279</i> | yes | no  | no  |
| <i>g6867</i> | no  | yes | no  |
| <i>g5710</i> | yes | no  | no  |
| <i>g7124</i> | yes | no  | no  |
| <i>g9412</i> | yes | no  | no  |
| <i>g7819</i> | no  | yes | no  |
| <i>g1953</i> | no  | yes | no  |
| <i>g178</i>  | yes | no  | no  |
| <i>g8179</i> | no  | yes | no  |
| <i>g2711</i> | no  | yes | no  |
| <i>g4974</i> | yes | no  | no  |
| <i>g1162</i> | no  | yes | no  |
| <i>g4806</i> | yes | no  | no  |

---

|              |     |     |    |
|--------------|-----|-----|----|
| <i>g6806</i> | yes | no  | no |
| <i>g2537</i> | yes | no  | no |
| <i>g405</i>  | no  | yes | no |
| <i>g4828</i> | no  | yes | no |
| <i>g4672</i> | no  | yes | no |
| <i>g338</i>  | yes | no  | no |
| <i>g5611</i> | no  | yes | no |
| <i>g7117</i> | yes | no  | no |
| <i>g783</i>  | no  | yes | no |
| <i>g5810</i> | yes | no  | no |
| <i>g4894</i> | no  | yes | no |
| <i>g5940</i> | yes | no  | no |
| <i>g8504</i> | yes | no  | no |
| <i>g1756</i> | no  | yes | no |
| <i>g3887</i> | no  | yes | no |
| <i>g5985</i> | yes | no  | no |
| <i>g2144</i> | yes | no  | no |
| <i>g117</i>  | yes | no  | no |
| <i>g1271</i> | yes | no  | no |
| <i>g9329</i> | no  | yes | no |
| <i>g7541</i> | yes | no  | no |
| <i>g8818</i> | no  | yes | no |
| <i>g3528</i> | yes | no  | no |
| <i>g4872</i> | yes | no  | no |
| <i>g5072</i> | no  | yes | no |
| <i>g2021</i> | no  | yes | no |
| <i>g7687</i> | yes | no  | no |
| <i>g5437</i> | no  | yes | no |
| <i>g2414</i> | no  | yes | no |
| <i>g8656</i> | yes | no  | no |
| <i>g6965</i> | no  | yes | no |
| <i>g7091</i> | yes | no  | no |
| <i>g1216</i> | yes | no  | no |
| <i>g3615</i> | no  | yes | no |
| <i>g3296</i> | yes | no  | no |
| <i>g1131</i> | no  | yes | no |
| <i>g3183</i> | yes | no  | no |
| <i>g1661</i> | no  | yes | no |
| <i>g6774</i> | no  | yes | no |
| <i>g8215</i> | no  | yes | no |
| <i>g210</i>  | yes | no  | no |
| <i>g6091</i> | no  | yes | no |
| <i>g5516</i> | yes | no  | no |
| <i>g1542</i> | no  | yes | no |

---

|              |     |     |     |
|--------------|-----|-----|-----|
| <i>g9106</i> | yes | no  | no  |
| <i>g255</i>  | yes | no  | no  |
| <i>g4299</i> | no  | yes | no  |
| <i>g1168</i> | yes | no  | no  |
| <i>g6068</i> | no  | yes | no  |
| <i>g1942</i> | yes | no  | no  |
| <i>g120</i>  | yes | no  | no  |
| <i>g5239</i> | yes | no  | no  |
| <i>g2185</i> | no  | yes | no  |
| <i>g6712</i> | yes | no  | no  |
| <i>g96</i>   | yes | no  | no  |
| <i>g3444</i> | no  | yes | no  |
| <i>g3352</i> | no  | yes | no  |
| <i>g7460</i> | yes | no  | no  |
| <i>g2145</i> | yes | no  | no  |
| <i>g1221</i> | no  | no  | yes |
| <i>g1662</i> | no  | yes | no  |
| <i>g3237</i> | yes | no  | no  |
| <i>g6405</i> | yes | no  | no  |
| <i>g8654</i> | yes | no  | no  |
| <i>g3944</i> | yes | no  | no  |
| <i>g6599</i> | yes | no  | no  |
| <i>g7481</i> | yes | no  | no  |
| <i>g8618</i> | yes | no  | no  |
| <i>g326</i>  | no  | yes | no  |
| <i>g5604</i> | no  | yes | no  |
| <i>g3300</i> | yes | no  | no  |
| <i>g7712</i> | yes | no  | no  |
| <i>g5226</i> | yes | no  | no  |
| <i>g570</i>  | no  | yes | no  |
| <i>g1626</i> | yes | no  | no  |
| <i>g4110</i> | yes | no  | no  |
| <i>g912</i>  | yes | no  | no  |
| <i>g5939</i> | no  | yes | no  |
| <i>g747</i>  | no  | yes | no  |
| <i>g7170</i> | no  | yes | no  |
| <i>g4714</i> | yes | no  | no  |
| <i>g2013</i> | yes | no  | no  |
| <i>g5892</i> | no  | yes | no  |
| <i>g4492</i> | yes | no  | no  |
| <i>g1020</i> | no  | yes | no  |
| <i>g4558</i> | no  | yes | no  |
| <i>g5976</i> | no  | yes | no  |
| <i>g1889</i> | yes | no  | no  |

---



|              |     |     |     |
|--------------|-----|-----|-----|
| <i>g2073</i> | yes | no  | no  |
| <i>g4006</i> | yes | no  | no  |
| <i>g8764</i> | yes | no  | no  |
| <i>g4195</i> | no  | yes | no  |
| <i>g4701</i> | yes | no  | no  |
| <i>g2715</i> | yes | no  | no  |
| <i>g8376</i> | yes | no  | no  |
| <i>g2118</i> | no  | yes | no  |
| <i>g4220</i> | yes | no  | no  |
| <i>g4992</i> | yes | no  | no  |
| <i>g4625</i> | yes | no  | no  |
| <i>g5338</i> | no  | yes | no  |
| <i>g239</i>  | yes | no  | no  |
| <i>g6281</i> | no  | yes | no  |
| <i>g5767</i> | yes | no  | no  |
| <i>g1657</i> | yes | no  | no  |
| <i>g6969</i> | no  | yes | no  |
| <i>g6987</i> | no  | yes | no  |
| <i>g4246</i> | no  | yes | no  |
| <i>g8977</i> | no  | yes | no  |
| <i>g6454</i> | no  | yes | no  |
| <i>g6191</i> | no  | yes | no  |
| <i>g4472</i> | yes | no  | no  |
| <i>g616</i>  | no  | no  | yes |
| <i>g4093</i> | yes | no  | no  |
| <i>g4189</i> | yes | no  | no  |
| <i>g7655</i> | no  | yes | no  |
| <i>g2590</i> | yes | no  | no  |
| <i>g7317</i> | no  | yes | no  |
| <i>g1948</i> | yes | no  | no  |
| <i>g6175</i> | yes | no  | no  |
| <i>g7274</i> | no  | yes | no  |
| <i>g7701</i> | no  | yes | no  |
| <i>g8905</i> | no  | yes | no  |
| <i>g4597</i> | no  | yes | no  |
| <i>g7866</i> | no  | yes | no  |
| <i>g2252</i> | yes | no  | no  |
| <i>g1988</i> | no  | yes | no  |
| <i>g6035</i> | no  | yes | no  |
| <i>g5660</i> | yes | no  | no  |
| <i>g1609</i> | yes | no  | no  |
| <i>g334</i>  | yes | no  | no  |
| <i>g5372</i> | yes | no  | no  |
| <i>g619</i>  | yes | no  | no  |

---

|              |     |     |    |
|--------------|-----|-----|----|
| <i>g6125</i> | no  | yes | no |
| <i>g292</i>  | yes | no  | no |
| <i>g5351</i> | yes | no  | no |
| <i>g692</i>  | yes | no  | no |
| <i>g894</i>  | no  | yes | no |
| <i>g106</i>  | no  | yes | no |
| <i>g1076</i> | yes | no  | no |
| <i>g133</i>  | yes | no  | no |
| <i>g6937</i> | yes | no  | no |
| <i>g6355</i> | yes | no  | no |
| <i>g6444</i> | yes | no  | no |
| <i>g1412</i> | yes | no  | no |
| <i>g4595</i> | yes | no  | no |
| <i>g5312</i> | no  | yes | no |
| <i>g7173</i> | yes | no  | no |
| <i>g1236</i> | yes | no  | no |
| <i>g2850</i> | no  | yes | no |
| <i>g5948</i> | yes | no  | no |
| <i>g9136</i> | yes | no  | no |
| <i>g8033</i> | no  | yes | no |
| <i>g1123</i> | no  | yes | no |
| <i>g1373</i> | no  | yes | no |
| <i>g3377</i> | yes | no  | no |
| <i>g6208</i> | no  | yes | no |
| <i>g1527</i> | yes | no  | no |
| <i>g6401</i> | yes | no  | no |
| <i>g6556</i> | yes | no  | no |
| <i>g399</i>  | yes | no  | no |
| <i>g7626</i> | no  | yes | no |
| <i>g7214</i> | no  | yes | no |
| <i>g174</i>  | yes | no  | no |
| <i>g6222</i> | yes | no  | no |
| <i>g3436</i> | no  | yes | no |
| <i>g7892</i> | yes | no  | no |
| <i>g8687</i> | yes | no  | no |
| <i>g6610</i> | no  | yes | no |
| <i>g6129</i> | no  | yes | no |
| <i>g1147</i> | no  | yes | no |
| <i>g7278</i> | no  | yes | no |
| <i>g8684</i> | no  | yes | no |
| <i>g4986</i> | yes | no  | no |
| <i>g4587</i> | no  | yes | no |
| <i>g4943</i> | no  | yes | no |
| <i>g7106</i> | no  | yes | no |

---

|              |     |     |     |
|--------------|-----|-----|-----|
| <i>g3599</i> | yes | no  | no  |
| <i>g644</i>  | no  | yes | no  |
| <i>g5471</i> | no  | yes | no  |
| <i>g6369</i> | yes | no  | no  |
| <i>g5760</i> | no  | yes | no  |
| <i>g365</i>  | no  | yes | no  |
| <i>g5720</i> | yes | no  | no  |
| <i>g6990</i> | no  | no  | yes |
| <i>g1649</i> | no  | yes | no  |
| <i>g2789</i> | no  | yes | no  |
| <i>g7805</i> | yes | no  | no  |
| <i>g4891</i> | yes | no  | no  |
| <i>g8633</i> | yes | no  | no  |
| <i>g6423</i> | yes | no  | no  |
| <i>g1176</i> | yes | no  | no  |
| <i>g9239</i> | no  | yes | no  |
| <i>g6409</i> | yes | no  | no  |
| <i>g7720</i> | yes | no  | no  |
| <i>g3590</i> | yes | no  | no  |
| <i>g1026</i> | yes | no  | no  |
| <i>g2710</i> | yes | no  | no  |
| <i>g3303</i> | yes | no  | no  |
| <i>g1163</i> | yes | no  | no  |
| <i>g8251</i> | yes | no  | no  |
| <i>g2616</i> | yes | no  | no  |
| <i>g766</i>  | yes | no  | no  |
| <i>g6570</i> | no  | yes | no  |
| <i>g4937</i> | no  | yes | no  |
| <i>g1991</i> | yes | no  | no  |
| <i>g4705</i> | yes | no  | no  |
| <i>g9368</i> | no  | yes | no  |
| <i>g7016</i> | no  | yes | no  |
| <i>g596</i>  | no  | yes | no  |
| <i>g7582</i> | yes | no  | no  |
| <i>g2163</i> | no  | yes | no  |
| <i>g3494</i> | yes | no  | no  |
| <i>g5590</i> | no  | yes | no  |
| <i>g2880</i> | yes | no  | no  |
| <i>g2037</i> | yes | no  | no  |
| <i>g9205</i> | yes | no  | no  |
| <i>g1417</i> | yes | no  | no  |
| <i>g7688</i> | no  | yes | no  |
| <i>g2846</i> | yes | no  | no  |
| <i>g1686</i> | yes | no  | no  |

---

|              |     |     |    |
|--------------|-----|-----|----|
| <i>g99</i>   | no  | yes | no |
| <i>g5423</i> | no  | yes | no |
| <i>g6800</i> | yes | no  | no |
| <i>g3853</i> | yes | no  | no |
| <i>g5385</i> | yes | no  | no |
| <i>g6169</i> | yes | no  | no |
| <i>g3181</i> | no  | yes | no |
| <i>g5544</i> | no  | yes | no |
| <i>g7308</i> | no  | yes | no |
| <i>g7986</i> | no  | yes | no |
| <i>g7931</i> | no  | yes | no |
| <i>g6497</i> | no  | yes | no |
| <i>g8202</i> | no  | yes | no |
| <i>g76</i>   | no  | yes | no |
| <i>g5221</i> | yes | no  | no |
| <i>g7099</i> | yes | no  | no |
| <i>g4605</i> | yes | no  | no |
| <i>g4988</i> | no  | yes | no |
| <i>g6793</i> | no  | yes | no |
| <i>g2967</i> | no  | yes | no |
| <i>g1279</i> | yes | no  | no |
| <i>g2143</i> | yes | no  | no |
| <i>g6448</i> | yes | no  | no |
| <i>g9312</i> | yes | no  | no |
| <i>g2121</i> | yes | no  | no |
| <i>g9105</i> | no  | yes | no |
| <i>g431</i>  | no  | yes | no |
| <i>g8794</i> | yes | no  | no |
| <i>g8043</i> | yes | no  | no |
| <i>g8911</i> | yes | no  | no |
| <i>g9055</i> | yes | no  | no |
| <i>g1735</i> | yes | no  | no |
| <i>g1090</i> | no  | yes | no |
| <i>g8714</i> | no  | yes | no |
| <i>g8552</i> | no  | yes | no |
| <i>g5934</i> | yes | no  | no |
| <i>g631</i>  | no  | yes | no |
| <i>g9314</i> | yes | no  | no |
| <i>g5155</i> | yes | no  | no |
| <i>g6414</i> | yes | no  | no |
| <i>g3758</i> | yes | no  | no |
| <i>g5719</i> | yes | no  | no |
| <i>g1085</i> | no  | yes | no |
| <i>g3865</i> | yes | no  | no |



|              |     |     |    |
|--------------|-----|-----|----|
| <i>g8649</i> | yes | no  | no |
| <i>g2581</i> | no  | yes | no |
| <i>g5299</i> | no  | yes | no |
| <i>g3745</i> | yes | no  | no |
| <i>g1253</i> | yes | no  | no |
| <i>g3978</i> | yes | no  | no |
| <i>g9433</i> | no  | yes | no |
| <i>g6624</i> | yes | no  | no |
| <i>g1965</i> | yes | no  | no |
| <i>g8626</i> | no  | yes | no |
| <i>g4081</i> | yes | no  | no |
| <i>g8774</i> | no  | yes | no |
| <i>g7890</i> | yes | no  | no |
| <i>g1613</i> | no  | yes | no |
| <i>g2192</i> | yes | no  | no |
| <i>g3085</i> | no  | yes | no |
| <i>g589</i>  | yes | no  | no |
| <i>g9348</i> | yes | no  | no |
| <i>g9155</i> | no  | yes | no |
| <i>g3960</i> | yes | no  | no |
| <i>g325</i>  | yes | no  | no |
| <i>g7724</i> | no  | yes | no |
| <i>g4685</i> | yes | no  | no |
| <i>g519</i>  | no  | yes | no |
| <i>g4537</i> | no  | yes | no |
| <i>g6809</i> | yes | no  | no |
| <i>g8798</i> | yes | no  | no |
| <i>g8590</i> | yes | no  | no |
| <i>g5621</i> | no  | yes | no |
| <i>g132</i>  | no  | yes | no |
| <i>g2578</i> | yes | no  | no |
| <i>g7779</i> | yes | no  | no |
| <i>g2385</i> | yes | no  | no |
| <i>g7065</i> | yes | no  | no |
| <i>g1132</i> | no  | yes | no |
| <i>g8448</i> | yes | no  | no |
| <i>g389</i>  | yes | no  | no |
| <i>g6521</i> | no  | yes | no |
| <i>g2196</i> | yes | no  | no |
| <i>g8260</i> | yes | no  | no |
| <i>g8662</i> | yes | no  | no |
| <i>g2020</i> | no  | yes | no |
| <i>g7305</i> | yes | no  | no |
| <i>g3513</i> | yes | no  | no |

---

|              |     |     |    |
|--------------|-----|-----|----|
| <i>g1940</i> | no  | yes | no |
| <i>g1734</i> | yes | no  | no |
| <i>g5774</i> | no  | yes | no |
| <i>g7163</i> | yes | no  | no |
| <i>g3867</i> | no  | yes | no |
| <i>g3467</i> | yes | no  | no |
| <i>g9013</i> | yes | no  | no |
| <i>g3915</i> | no  | yes | no |
| <i>g8054</i> | no  | yes | no |
| <i>g5552</i> | yes | no  | no |
| <i>g4173</i> | yes | no  | no |
| <i>g7707</i> | yes | no  | no |
| <i>g8436</i> | yes | no  | no |
| <i>g2586</i> | yes | no  | no |
| <i>g3794</i> | no  | yes | no |
| <i>g1170</i> | yes | no  | no |
| <i>g4328</i> | yes | no  | no |
| <i>g8593</i> | no  | yes | no |
| <i>g6768</i> | yes | no  | no |
| <i>g1198</i> | yes | no  | no |
| <i>g4764</i> | no  | yes | no |
| <i>g3579</i> | no  | yes | no |
| <i>g4312</i> | yes | no  | no |
| <i>g8005</i> | yes | no  | no |
| <i>g8710</i> | no  | yes | no |
| <i>g7544</i> | no  | yes | no |
| <i>g7487</i> | yes | no  | no |
| <i>g6435</i> | yes | no  | no |
| <i>g4196</i> | no  | yes | no |
| <i>g7702</i> | yes | no  | no |
| <i>g1610</i> | yes | no  | no |
| <i>g240</i>  | yes | no  | no |
| <i>g20</i>   | no  | yes | no |
| <i>g997</i>  | yes | no  | no |
| <i>g2079</i> | no  | yes | no |
| <i>g5197</i> | yes | no  | no |
| <i>g3767</i> | no  | yes | no |
| <i>g617</i>  | yes | no  | no |
| <i>g1833</i> | yes | no  | no |
| <i>g8883</i> | yes | no  | no |
| <i>g2222</i> | yes | no  | no |
| <i>g1891</i> | no  | yes | no |
| <i>g3553</i> | yes | no  | no |
| <i>g3367</i> | no  | yes | no |

---

|              |     |     |     |
|--------------|-----|-----|-----|
| <i>g8152</i> | no  | yes | no  |
| <i>g4840</i> | no  | yes | no  |
| <i>g850</i>  | yes | no  | no  |
| <i>g3082</i> | yes | no  | no  |
| <i>g3585</i> | yes | no  | no  |
| <i>g1334</i> | yes | no  | no  |
| <i>g7339</i> | yes | no  | no  |
| <i>g93</i>   | yes | no  | no  |
| <i>g1698</i> | yes | no  | no  |
| <i>g5489</i> | yes | no  | no  |
| <i>g2696</i> | no  | yes | no  |
| <i>g1192</i> | yes | no  | no  |
| <i>g25</i>   | yes | no  | no  |
| <i>g5258</i> | no  | yes | no  |
| <i>g1829</i> | yes | no  | no  |
| <i>g5295</i> | no  | yes | no  |
| <i>g5491</i> | no  | no  | yes |
| <i>g3638</i> | yes | no  | no  |
| <i>g3150</i> | yes | no  | no  |
| <i>g1141</i> | yes | no  | no  |
| <i>g8508</i> | no  | yes | no  |
| <i>g8600</i> | no  | yes | no  |

---
